# Supplementary material for: Downregulation of M Current Is Coupled to Membrane Excitability in Sympathetic Neurons Before the Onset of Hypertension
Source: PubMed Central journal article supplement (PMC8360673; doi:10.1161/hypertensionaha.120.15922), 2020-10-12
Supplement: hyp-76-1915-s002.pdf [file hyp-76-1915-s002.pdf]

## Online supplement

### **Downregulation of M current is coupled to membrane excitability in sympathetic neurons before the onset of hypertension**

Harvey Davis, Neil Herring, David J Paterson

**Correspondence:** Harvey Davis, University of Oxford, [harvey.davis@dpag.ox.ac.uk](mailto:harvey.davis@dpag.ox.ac.uk), 07456676414 or David J Paterson, University of Oxford, [david.paterson@dpag.ox.ac.uk](mailto:david.paterson@dpag.ox.ac.uk), 01865 272430

## Supplementary methods

**Cell isolation and culturing** Stellate ganglia were dissected and immediately transferred to ice-cold HEPES buffered L15 media (L1518, Thermofisher, US). Ganglia were then cut into 2 mm sections using surgical scissors, and enzymatically digested at 37 °C first using 1 mg/ml Collagenase IV (Worthington, US) in L15 for 25 minutes, followed by 30 minutes in 2 mg/ml Trypsin (Worthington, US) in Ca<sup>2+</sup> and Mg<sup>2+</sup> free Hanks buffered salt solution (Thermofisher, US). Enzymes were then inhibited using two washes of a blocking solution containing 10% FBS. The tissue was then suspended in a plating media containing Neurobasal plus media, B27 plus, 100 ng/ml 2.5s NGF, 25 mM glutamax and 50 units/ml Pen-strep and mechanically disrupted using a fire-blown glass pipette. The cell suspension was then plated onto Poly-D-lysine coated Fluorodish 35 mm dishes (WPI, US), which had been previously incubated for 2 hours with 1 ug/ml laminin, a concentration chosen to allow cell adhesion and survival, but limiting neurite outgrowth<sup>43</sup>. The cells were then incubated at 37 °C with 5% CO<sub>2</sub> for a period of 1-5 days in vitro before use. All datasets were recorded from at least 2 cultures, with each culture requiring 4 animals. Phase contrast microscopy was used to enable neuronal identification. Neurons were identified in dissociated culture based on their large size and circular somata relative to the surrounding cell types. Each culture was produced from a minimum of 2 animals, with each experiment being performed on a minimum of two cultures.

**Electrophysiological Data acquisition** All electrophysiological data were acquired using Winwcp (Version 5.4.0) and recorded via a Multiclamp 700B amplifier (Molecular Devices, US) with an axon digidata 1550A (Molecular devices, US) digitizer. All current clamp recordings were sampled at 10 kHz. M-current deactivation curves were sampled at 10 KHz.

**Perfusion** Cells were constantly perfused at a rate of 5-6 ml/min, drugs were applied via this perfusion system. Most drugs were continuously applied for a duration of 5 minutes before data acquisition, XE-991 and substituted LiCl were perfused for 10 minutes before recording. Recordings were performed at room temperature.

**Perforated patch-clamp recordings** Amphotericin B (0.48 mg/ml) was used as the perforating agent<sup>44</sup>, recordings were initiated after low series-resistance electrical access was achieved (<30 MΩ) and stable for a period of five minutes. All voltage clamp recordings used 70% series resistance compensation and capacitance cancellation. Current clamp recordings were bridge balanced. All recordings were monitored throughout, and recordings with R<sub>s</sub> changes > 20% were discarded. The external recording solution for both current clamp and voltage clamp recordings was as follows: 5.2 mM KCl, 140 mM NaCl, 1 mM MgCl<sub>2</sub>, 1.8 mM CaCl<sub>2</sub>, 10 mM HEPES, 10 mM D-Glucose. External solution pH was adjusted to 7.4 with NaOH. For removal of external calcium, calcium was excluded from this solution and 5 mM EGTA was added. The internal solution was composed as follows: 145 mM K<sup>+</sup>-Aspartate, 2.2 mM EGTA, 10 mM HEPES, 1 mM MgCl<sub>2</sub>. Internal pH was adjusted to 7.3 using KOH.

**Whole cell patch-clamp recordings** Whole cell action potential recordings with R<sub>s</sub> values >12 MΩ discarded. Current clamp recordings were bridge balanced and membrane potentials were corrected for liquid junction potentials. All recordings were monitored throughout, and recordings with R<sub>s</sub> changes > 20% were discarded. Single action potentials were evoked via a 10ms positive current injection, at the minimal required injection size. External solution composition was the same as for perforated patch. For LiCl substitution experiments, 140 mM LiCl was substituted for NaCl. The internal solution was as follows: 130 mM K<sup>+</sup>-Gluconate, 10

mM KCl, 10 mM HEPES, 10 mM Na<sup>+</sup>-Phosphocreatine, 4 mM MgATP, 0.3 mM Na<sub>2</sub>GTP. Internal pH was adjusted to 7.3 with KOH. To study K<sub>Na</sub>, NaCl was substituted for LiCl to allow an inward g<sub>Li</sub> via Na<sub>v</sub> channels but prevent activation of slick and slack channels by intracellular sodium<sup>45</sup>. For Ca<sup>2+</sup> free experiments, Ca<sup>2+</sup> was removed from the external solution and 5 mM EGTA, a Ca<sup>2+</sup> buffer, was added.

**qRT-PCR** Total RNA from whole flash frozen stellate ganglia was isolated using a RNeasy minikit (Qiagen, US) and immediately stored on dry ice before cDNA library preparation. For cDNA synthesis, Superscript IV VILO with ezDNase genomic DNA depletion (Thermofisher, US) was used, cDNA was then stored at -80°C until required. Taqman PCR primers were used for the transcript identification of KCNQ2 (Rn00591249\_m1), KCNQ3 (Rn00580995\_m1), KCNQ5 (Rn01512013\_m1), SCN10A (Rn00568393\_m1), where either GAPDH (Rn01775763\_g1) or B2M (Rn00560865\_m1) were used to normalize values to their age matched controls via the  $\Delta\Delta CT$  method<sup>46</sup>. Samples were measured on an ABI Prism 7000 (Thermofisher, US) as per the standard protocol for taqman. The known clinical characteristics of the 4 donor human stellate ganglia samples were as follows: Sample ID 19, Male, 77 years old, 30-35% left ventricular ejection fraction, nonischemic cardiomyopathy and ventricular fibrillation; Sample ID 20, Female, 61 years old, Hypertension and hypothyroidism; Sample ID 23, Male, 19 years old, left ventricular ejection fraction 55-60%, normal cardiac function; Sample ID 24, Male, 62 years old, left ventricular ejection fraction 50%, polymorphic ventricular tachycardia.

**Cryosectioning and Immunohistochemistry** Freshly isolated stellate ganglia were immediately transferred to 4% paraformaldehyde for 1-2 hours, after which the tissue was incubated overnight in 20% sucrose-PBS at 4 °C, before embedding in OCT compound (Tissue-Tek). Tissue was then frozen and stored at -80 °C until cryosectioning the tissue as 12  $\mu$ m sections. Slides were then permeabilized in 0.3% triton-X for 30 minutes at room temperature, before blocking for 2 hours in 1% BSA, 5% donkey serum. Sections were then incubated for 24 hours with primary antibodies at 4°C, followed by five 5 minute washes in PBS and 2 hours incubation with the relevant secondary antibodies. Sections were subsequently washed 3 times in PBS, and incubated with DAPI/PBS for 5 minutes, before a final 2 washes in PBS. Slides were then mounted with 50% glycerol in PBS before imaging. Sections were imaged on a Zeiss LSM 880 Airy Scan Upright laser-scanning confocal microscope with a Plan-Apochromat 20x/0.8 M27 objective. Sections were DAPI stained, labelled with a mouse anti-TH antibody (66334-1-Ig) (ProteinTech, US) and a rabbit antibody against either KCNQ2 (ab22897), KCNQ3 (ab66640) or KCNQ5 (ab66740) (Abcam, UK). For secondary antibodies, 1:200 Donkey anti-mouse Alexa Fluor 555 (A-31570) and 1:200 Donkey anti-rat Alexa Fluor 488 (A-21208) were used (Invitrogen).

**Single cell RNA-sequencing** A pooled single cell suspension of stellate ganglia cells from six animals per strain was prepared via enzymatic dissociation as described under cell culture methods. Following blockade of enzymatic activity via three washes in blocking solution, the cell solution was transferred to phosphate buffered saline. The cell solutions were immediately transferred to ice and transported to the Wellcome Trust Centre for Human Genetics (WTHCG) for scRNAseq via 10x genomics chromium (10x genomics, US) (Single Cell 3' v3) and Illumina hiseq 4000 (Illumina, US). This approach achieved 66-72K mean reads per cell and a sequencing depth of 53-55% per cell before filtering.

Initial analysis was performed by the WTHCG using the cell ranger pipeline (x10 genomics, US) (Cell ranger, v3.0.2) (Rnor6.0) with default parameters, before the data were exported to

Seurat (v3.0)<sup>47</sup> and analyzed in house. Cells were excluded in Seurat if the number of counts per cell was less than 4000 or percentage of mitochondrial genes was equal to or less than 0.3. For FindVariableFeatures we used 10000 features and the election method VST. Data was intergrated using 30 dimensions, 30 principle components were using for PCA analysis. UMAP and TSNE, FindNeighbours were ran with 19 dimensions. Findclusters was ran with a resolution of 0.6. Differential expression analysis was performed via MAST<sup>48</sup> within Seurat. To determine multiple neuron populations for supplementary figure 5, findclusters was ran at a resolution of 10, and neuron-like groups were subset for further analysis. Individual groups were then visually identified based upon clear separation from neighbouring subgroups.

**Electrophysiological Data analysis** Analysis of firing rate data were performed in WinWCP (v5.4.0). M-current deactivation curves were analyzed within Clampfit (v10.7, Molecular Devices, US). Graphs were produced in either Graphpad prism (v8.2.1) or ggplot2 (v3.2.1) and Waffle (v1.0.1) in R (Version 3.5.3). Statistical analysis was performed in GraphPad prism, all relevant datasets were normality tested.

Firing rate was taken as the maximum firing rate elicited by a range of 10 pA current injections between 10-200 pA. Membrane potential was monitored for stability during drug wash in and cells with large jumps in membrane potential were discarded.

Action potential parameters were measured from the first sequential 50 pA current step that induced an action potential. Peak amplitude (mV) was taken as the difference between the average baseline and maximum peak response of the action potential. Action potential upstroke (mV/ms) was taken as the maximum velocity from baseline to the peak amplitude.

Input resistance was calculated based upon a series of hyperpolarizing and depolarizing current injections ranging from -200 to 200 pA in amplitude in 10 pA increments<sup>49</sup>. The average value of the final 100 ms was analyzed. As previously classified, small hyperpolarizing pulses were assumed to elicit the least active processes and any points that departed from linearity with these points or contained visible active processes in the final 200 mS of current injection were excluded.

Liquid junction potentials were calculated in JPCalcW<sup>50</sup> in Clampex (v11.0.3) (Molecular Devices, US), where ion availabilities were used instead of concentrations. Free Ca<sup>2+</sup>, ATP, EGTA and Mg<sup>2+</sup> for internal solutions were estimated via MaxChelator (v8)<sup>51</sup> when relevant. For perforated-patch voltage-clamp and current clamp recordings a Liquid junction potential of 24.3 mV was calculated, without correction for the perforated patch Donnan potential<sup>52</sup>. Whole cell current clamp recordings had an estimated liquid junction potential of -15.7 mV.

## Supplementary Figures

**Figure S1** Analysis of the relationship between cell capacitance, days in vitro (DIV) and maximum firing rate in either strain as measured by perforated patch clamp. (A) The number of days in vitro does not affect the maximum neuronal firing rate in Wistar neurons (Median) (DIV1, 2 Hz, n = 19; DIV2, 2 Hz, n = 14; DIV3, 1.5 Hz, n = 28; DIV4, 1 Hz, n = 5) (Kruskal-Wallis test, n = 66, p = 0.48). (B) There is no clear relationship between cell capacitance and firing rate in Wistar neurons. (C) The number of days in vitro does not affect the maximum neuronal firing rate in SHR neurons (Median) (DIV1, 5.5 Hz, n = 18; DIV2, 9 Hz, n = 22; DIV3, 9.5 Hz, n = 18; DIV4, 4 Hz, n = 10; DIV5, 8.5 Hz, n = 2) (Kruskal-Wallis test, n = 70, p = 0.35). (D) There is no clear relationship between cell capacitance and firing rate in SHR neurons. (E) There is not a significant difference in the number of days in vitro between strains (Median) (Wistar, 2.5 days, n = 66; SHR, 2 days, n = 70) (Mann-Whitney test, p = 0.83). (F) There is no significant difference in capacitance between strains, although there is a non-significant trend (Median) (Wistar, 26.74 pF, n = 66; SHR, 23.35 pF, n = 70) (Mann-Whitney, p = 0.27). (G) Dependence of firing rate on membrane potential was determined in SHR neurons by applying a pre-pulse in the range -10 to -100 pA for 1 second before applying a 150 pA positive current injection to elicit cell firing. No difference was found (Friedman test, n = 26, p = 0.165).

**Figure S2** Single cell RNA-sequencing and a panel of pharmacological inhibitors were used to determine remaining channels involved in SHR enhanced firing, that may be targetable for the reduction of aberrant sympathetic hyperactivity or key to the SHR sympathetic pathology. Single-cell RNA-sequencing was used to identify the cell specific expression patterns of a range of channel subunits which are typically implicated in the control of firing rate in other neuronal populations. Here percentage expressed indicates the number of cells per cluster identity exhibiting transcript expression and average expression refers to the average expression per cluster identity. The table highlights the effect of selective inhibitors on firing rate for channels not shown in the main manuscript. Data shown for 1s 50 pA, 100 pA, 150 pA current injections and at maximum firing frequency between 0-200 pA current amplitude. Paired comparisons were made by Wilcoxon tests.

**Figure S3** Immunohistochemistry showing M-current subunit protein in TH-positive neurons in cryosections of 5-6 week old Wistar stellate ganglia (KCNQ2, KCNQ3 and KCNQ5).

**Figure S4** Neural subtypes correlate with measures of  $I_M$  and  $I_{Na}$ . (A) A summary figure for proposed contribution of M-current and  $I_{Na}$  to firing rate classes in stellate ganglia neurons. (B) M-current density was lower in Tonic firing neurons than phasic 2 neurons (Median±IQR) (Phasic 1, -4.09 pA/pF, n=7; Phasic 2, -7.18 pA/pF, n=12; Tonic, -2.62 pA/pF, n=18) (Kruskal-Wallis test; p = 0.0019) (Dunn's multiple comparisons test; Phasic 2 vs Tonic, p = 0.0012). (C) Upstroke velocity for phasic 1, phasic 2 and tonic neurons revealed a higher Tonic velocity (Median ± IQR) (Phasic 1, 34.71 mV/ms, n = 20; Phasic 2, 63.65 mV/ms, n = 32; Tonic, 85.38 mV/ms, n = 37) (Kruskal-Wallis test; p = 0.0018) (Dunn's multiple comparisons test; Phasic 1 vs Tonic, p = 0.0012). (D) Action potential amplitude was significantly higher for phasic 2 and tonic neurons than in phasic 1 neurons (Mean ± SEM) (Phasic 1, 68.30 ± 4.49 mV, n = 21; Phasic 2, 78.25 ± 2.25 mV, n = 32; Tonic, 81.96 ± 2.14mV, n = 37) (One-way ANOVA; p = 0.0071) (Holm-sidak's multiple comparisons test; Phasic 1 vs Phasic 2, p = 0.049; Phasic 1 vs Tonic, p = 0.0054).

**Figure S5** Experimental demonstration of the role of  $I_{Na}$  and  $I_M$  in determining firing class. Nav1.6 inhibition significantly reduced firing rate in M-current (3  $\mu$ M XE-991) inhibited Wistar neurons (Median) (Control, 2 Hz; XE-991 treated, 3 Hz; XE-991 and 4,9-Anhydrotetrotoxin treated, 1 Hz) (Friedman test,  $n = 10$ ,  $p = 0.0084$ ) (Dunn's Multiple comparisons test; XE-991 treated vs XE-991 + 4,9-Anhydrotetrotoxin,  $p = 0.038$ ).

**Figure S6** Evidence of multiple populations of sympathetic neurons. (A) Visually identified cell clusters of potential sympathetic neurons. (B) Expression of key transcripts for noradrenaline synthesis and breakdown are shown for each neuron cluster. Of these groups only Neurons 1 and Neurons 2 appear to adequately express the full noradrenaline synthesis pathway. (C) Sympathetic Neurons 1 are shown to have low expression of CHRM2 and NPY, two physiologically important genes, in contrast to high expression in Sympathetic Neurons 2. For reference, these groups are termed Type A sympathetic neurons (Sympathetic Neurons 1), and type B sympathetic neurons (Sympathetic Neurons 2). Importantly, we also demonstrate that both groups have similar ion channel profiles, with no significant differences observed between groups.

**Figure S7** Top changes in neuronal cluster gene expression between Wistar and SHR strains (relative to Wistar) as determined by Single cell RNA-sequencing. (A) Top 50 genes that are significantly increased in the SHR. (B) Top 50 genes that are significantly decreased in the SHR. (C) Top 50 genes expressed independent of strain in Wistar and SHR neurons. (D) Channel encoding genes assessed for comparison of genes involved in firing rate.

**Figure S8** Unbiased markers for major cell clusters found in the stellate ganglia as detected by Seurat analysis. (A) Top 30 markers for the immune cell cluster. (B) Top 30 markers for the Vascular smooth muscle cell cluster. (C) Top 30 markers for the glial cell cluster. (D) Top 30 markers for the Fibroblast cell cluster. (E) Top 30 markers for the endothelial cell cluster. (F) Top 30 markers for sympathetic neuron clusters.

S1

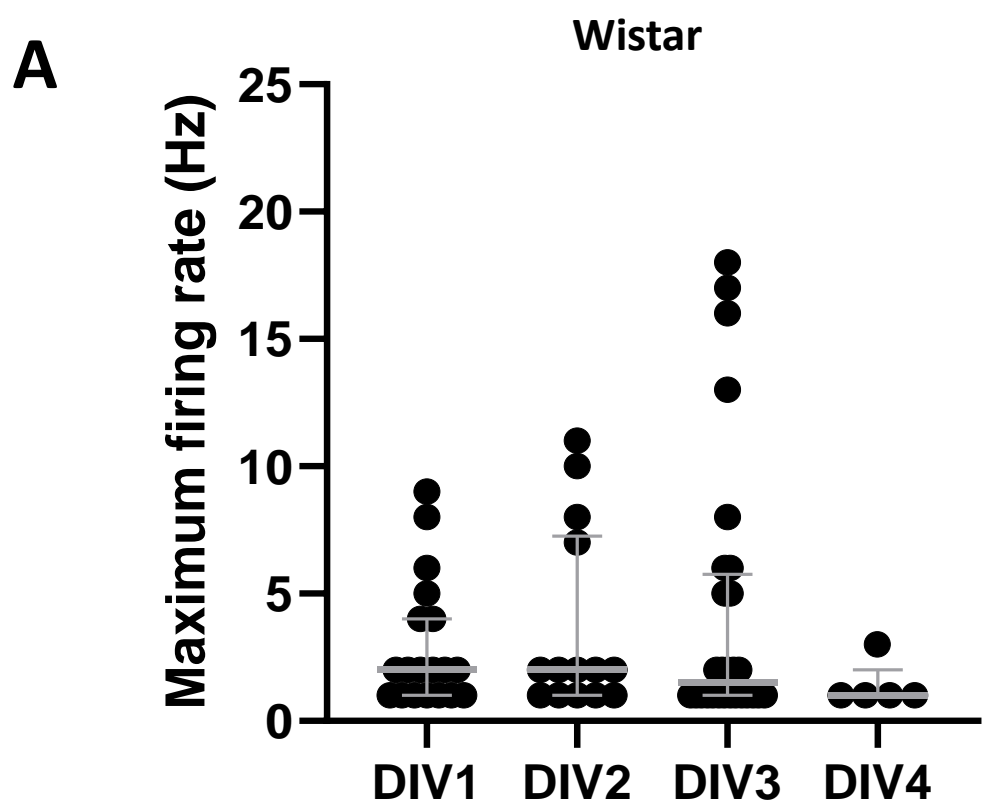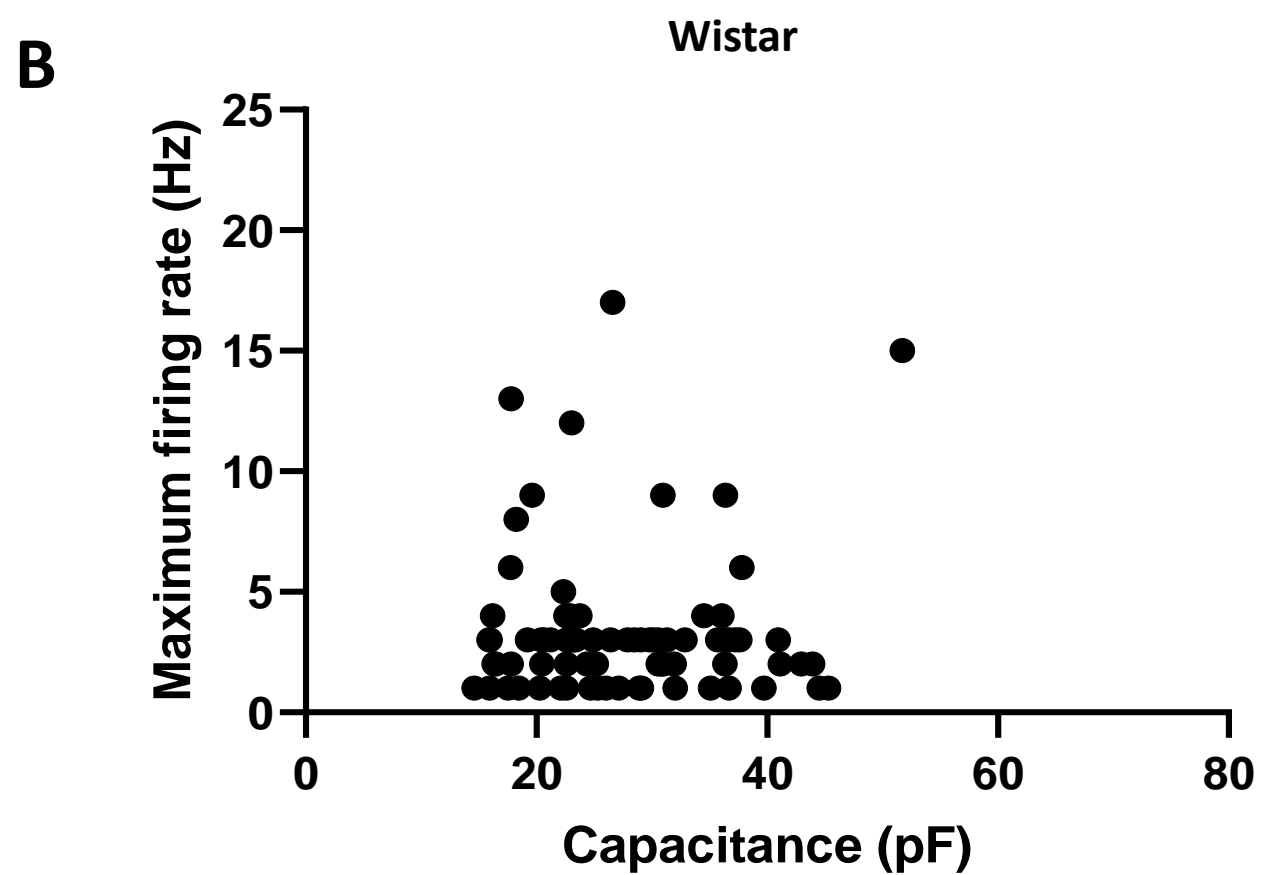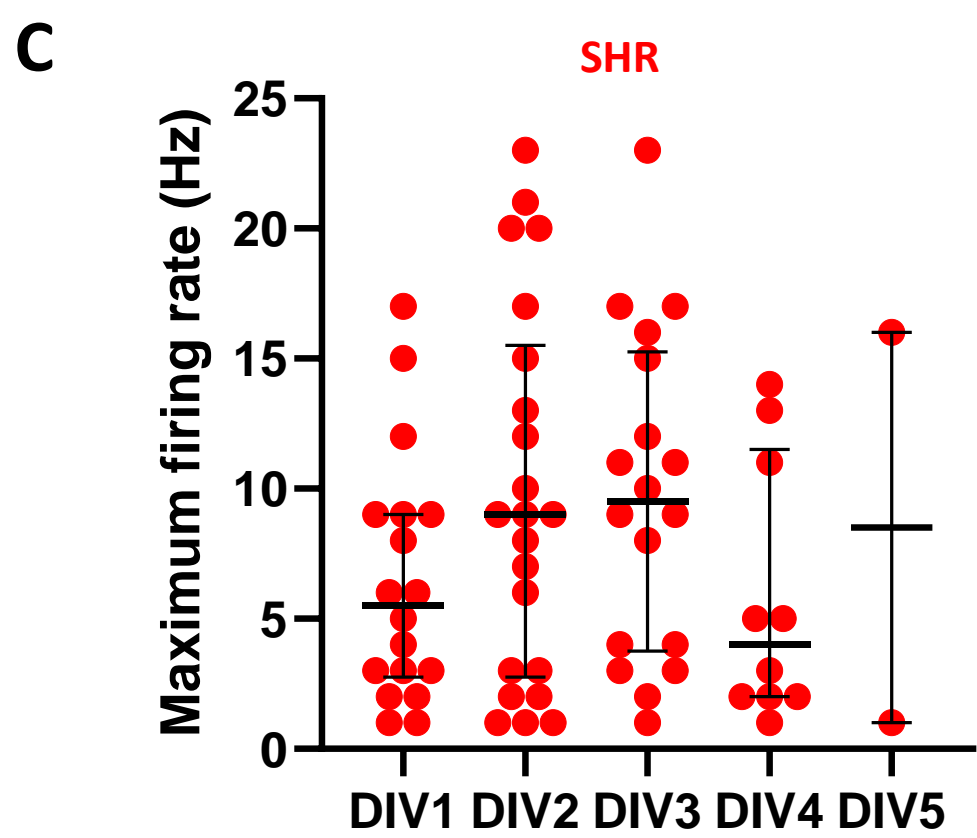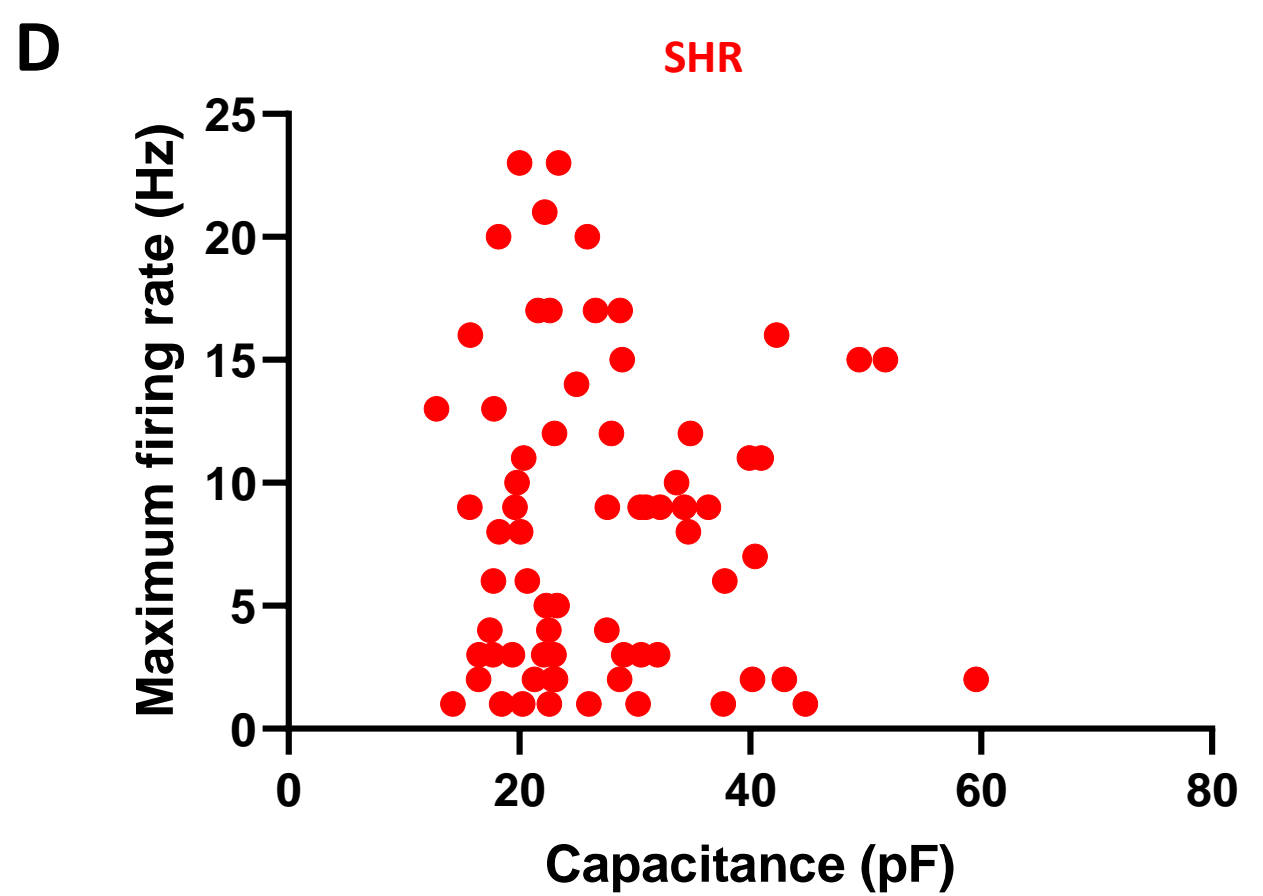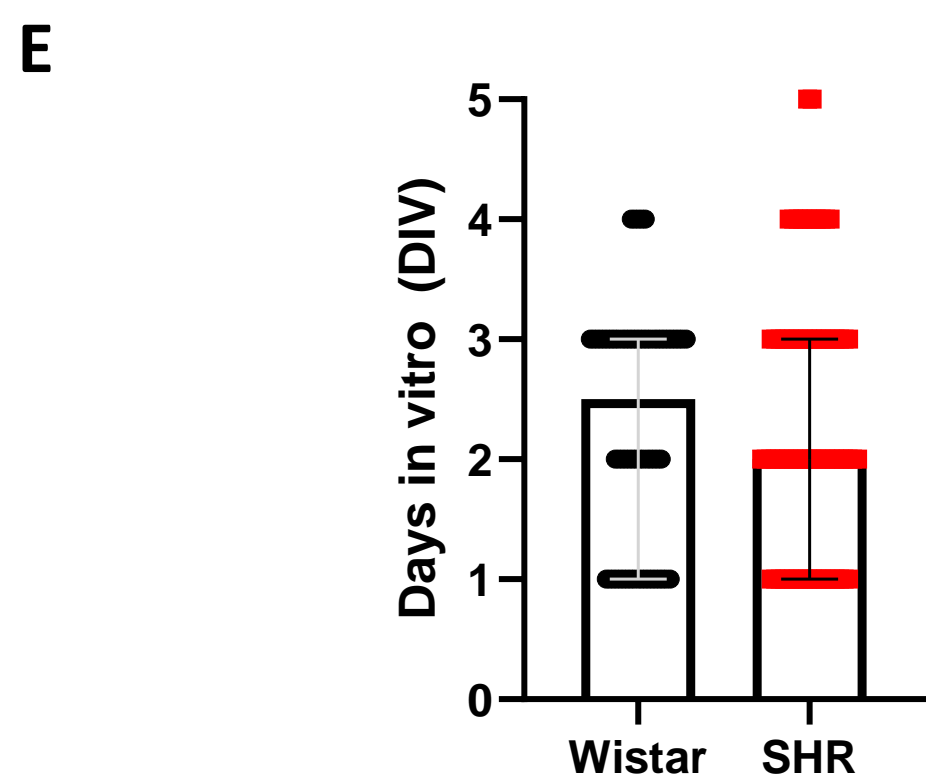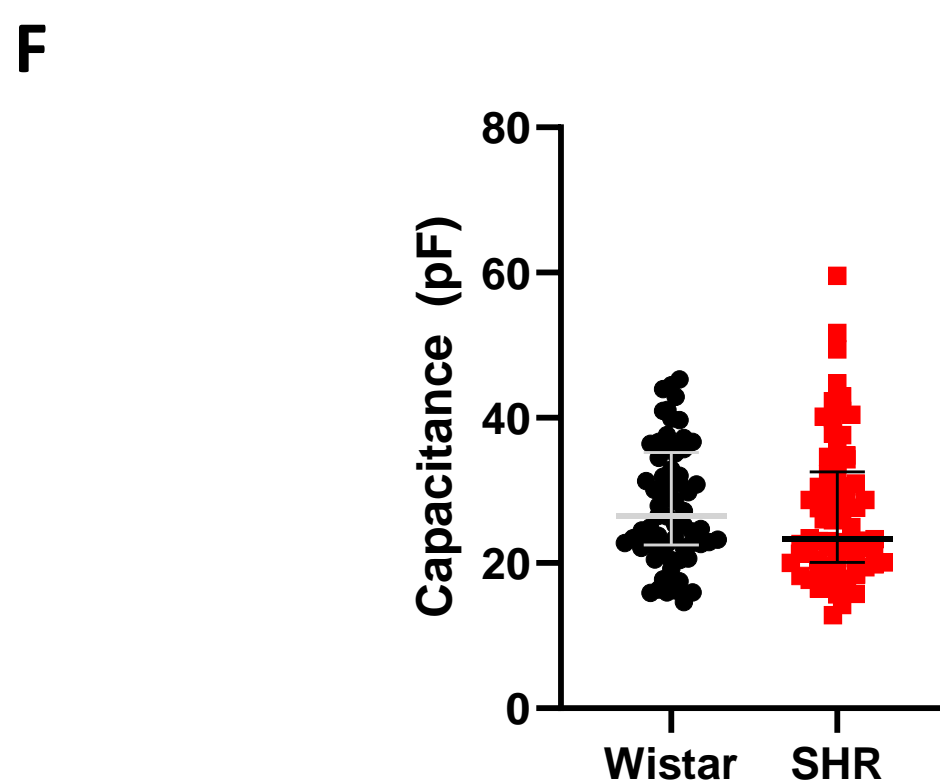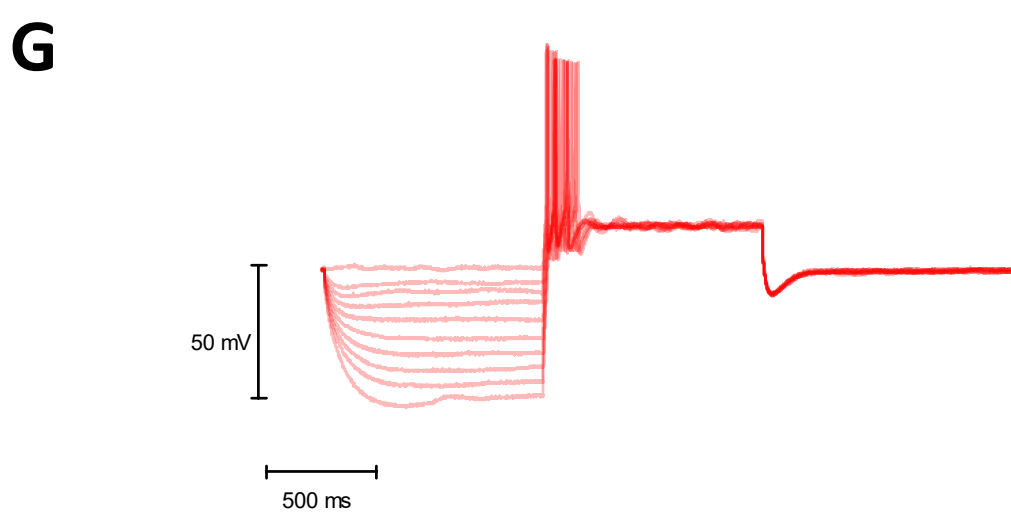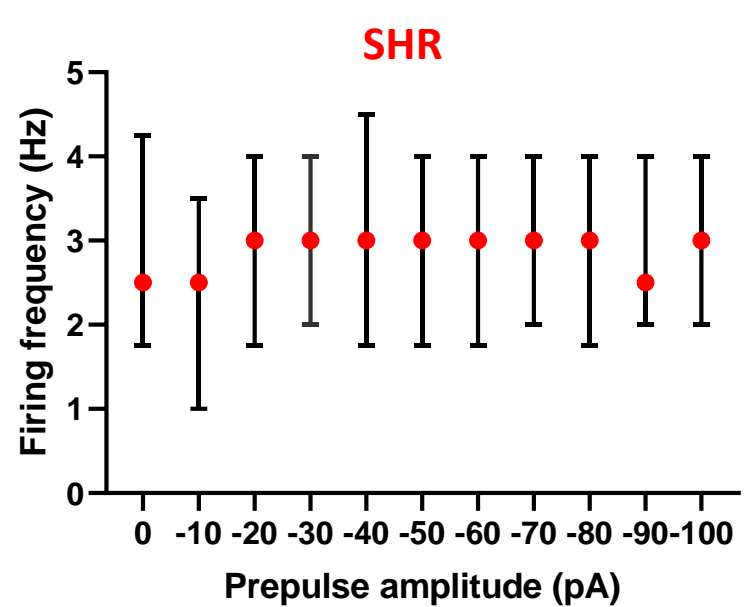

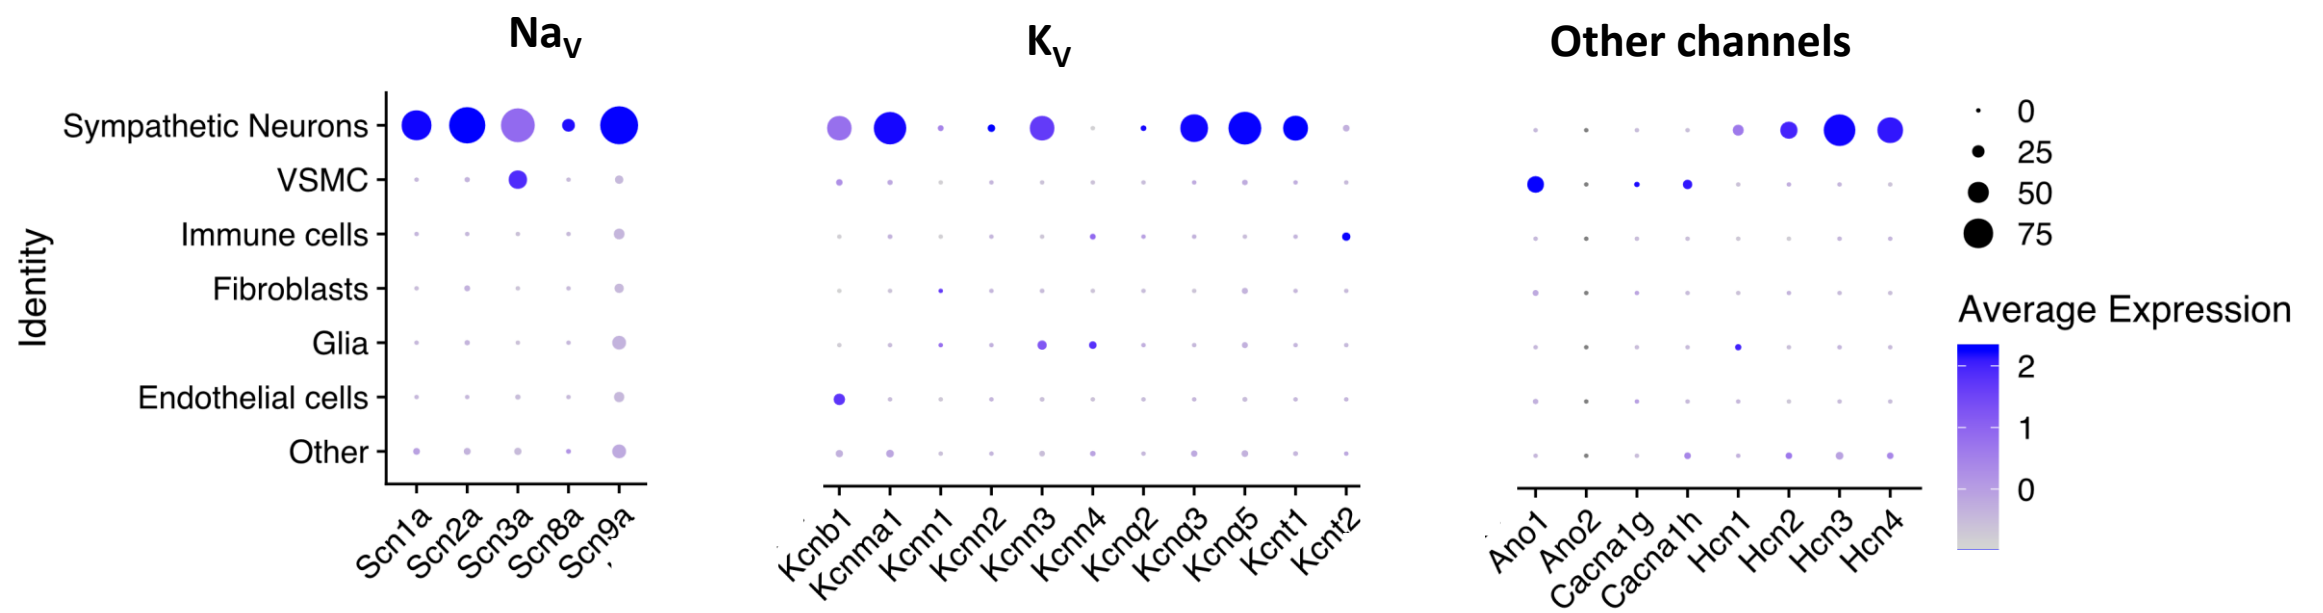

|                              | HCN          |              | T-type       |              | Ca <sup>2+</sup> free | SK            | BK           | CaCC         | Nav1.7       |               | K <sub>v</sub> 2.1 | KNa        |
|------------------------------|--------------|--------------|--------------|--------------|-----------------------|---------------|--------------|--------------|--------------|---------------|--------------------|------------|
| <b>Drug</b>                  | Ivabradine   | ZD7288       | TTA-A2       | TTA-P2       | EGTA                  | Apamin        | Iberiotoxin  | Ani9         | Protx-III    | Huwentoxin-IV | Guangxitoxin       | Lithium    |
| <b>Concentration</b>         | 3μM          | 1μM          | 500nm        | 1μM          | 5mM                   | 200nM         | 100nM        | 1μM          | 50nM         | 50nM          | 100nM              | N/A        |
| <b>Perforating agent</b>     | Amphotericin | Amphotericin | Amphotericin | Amphotericin | Amphotericin          | Amphotericin  | Amphotericin | Amphotericin | Amphotericin | Amphotericin  | Amphotericin       | Whole cell |
| <b>Δ Firing rate 150pA</b>   | -1           | 0            | 0            | -1           | -1                    | 1.5           | 0            | 0.5          | 0            | 2.5           | <b>3</b>           | 0          |
| <i>P value</i>               | 0.67         | 0.5          | >0.99        | 0.60         | 0.59                  | 0.9375        | 0.81         | 0.87         | 0.38         | 0.11          | <b>0.0078</b>      | 0.84       |
| <b>Δ Firing rate 100pA</b>   | 0            | 0.5          | 0            | -0.5         | 1                     | 1             | 0            | 0.5          | 0            | 0.5           | <b>2.5</b>         | 0          |
| <i>P value</i>               | 0.75         | 0.95         | 0.25         | 0.89         | 0.22                  | 0.0625        | 0.94         | 0.55         | 0.44         | 0.19          | <b>0.0156</b>      | 0.5        |
| <b>Δ Firing rate 50pA</b>    | 0            | 0.5          | 1            | 0            | 0                     | 3             | 0            | 0.5          | -0.5         | 0             | 0                  | 0          |
| <i>P value</i>               | 0.19         | 0.25         | 0.16         | >0.99        | 0.094                 | 0.0938        | >0.9999      | 0.5156       | 0.63         | 0.5           | >0.9999            | 0.25       |
| <b>Δ Maximum firing rate</b> | 0            | 0            | 0            | -0.5         | 0.5                   | <b>4</b>      | 0            | 1            | -0.5         | 1             | <b>1.5</b>         | 0          |
| <i>P Value</i>               | 0.13         | >0.99        | 0.63         | 0.51         | 0.61                  | <b>0.0156</b> | 0.60         | 0.29         | 0.67         | 0.19          | <b>0.0391</b>      | 0.81       |
| <b>n</b>                     | 10           | 8            | 9            | 10           | 12                    | 8             | 12           | 10           | 8            | 8             | 8                  | 10         |



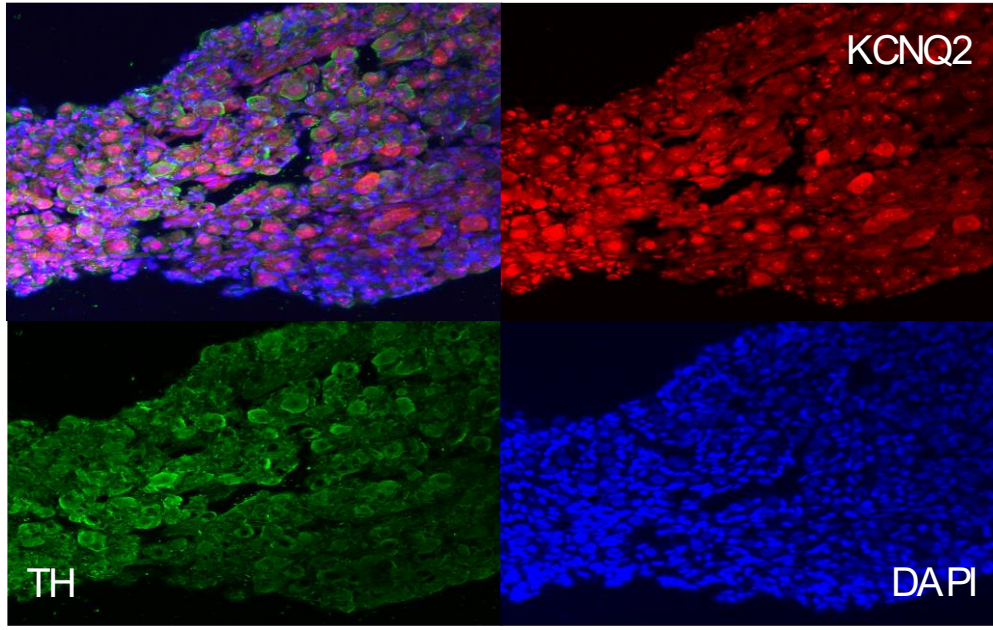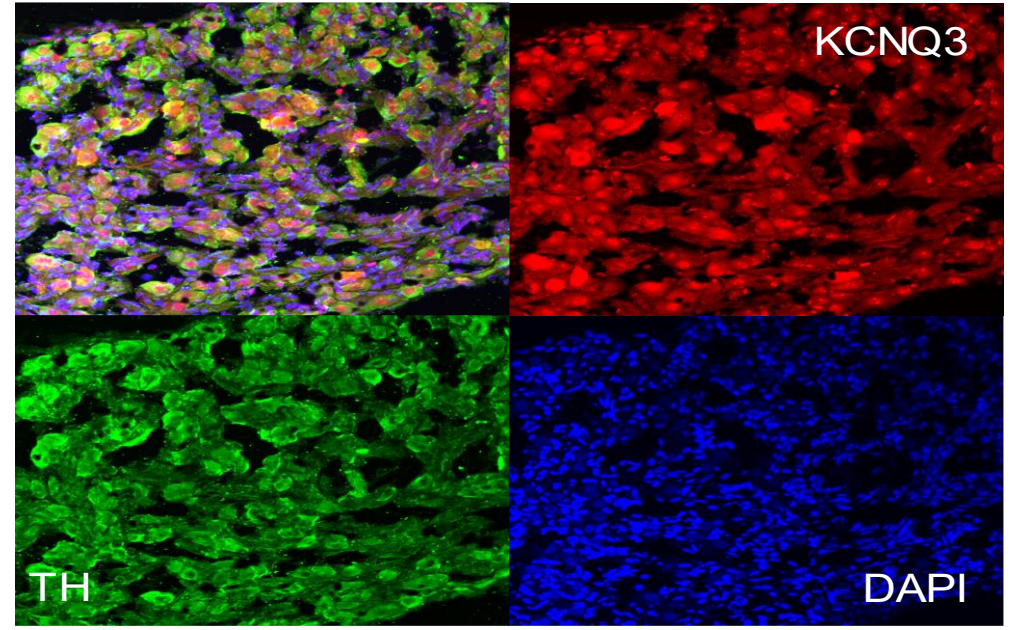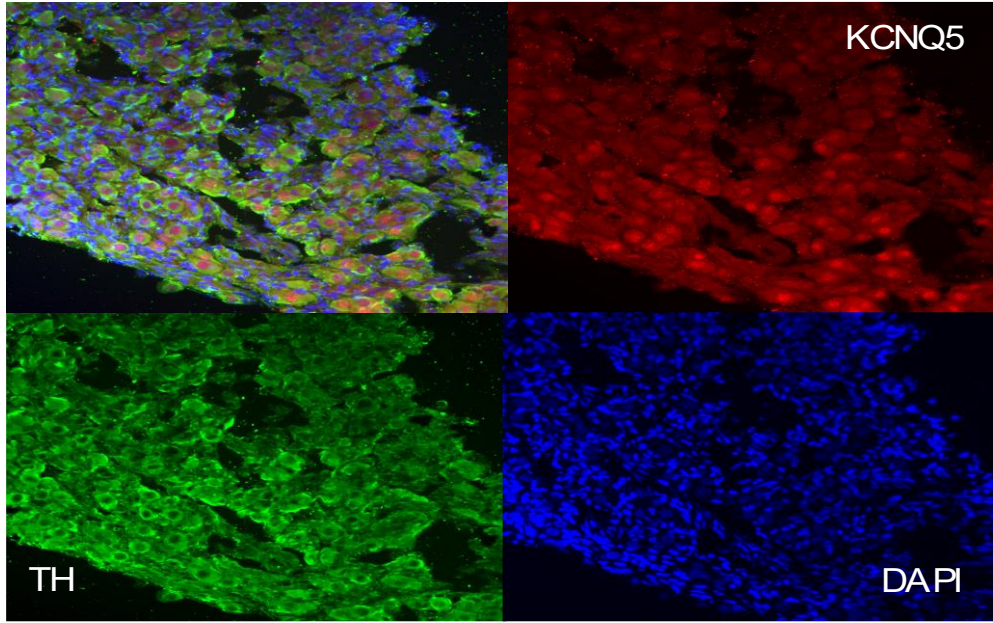

A

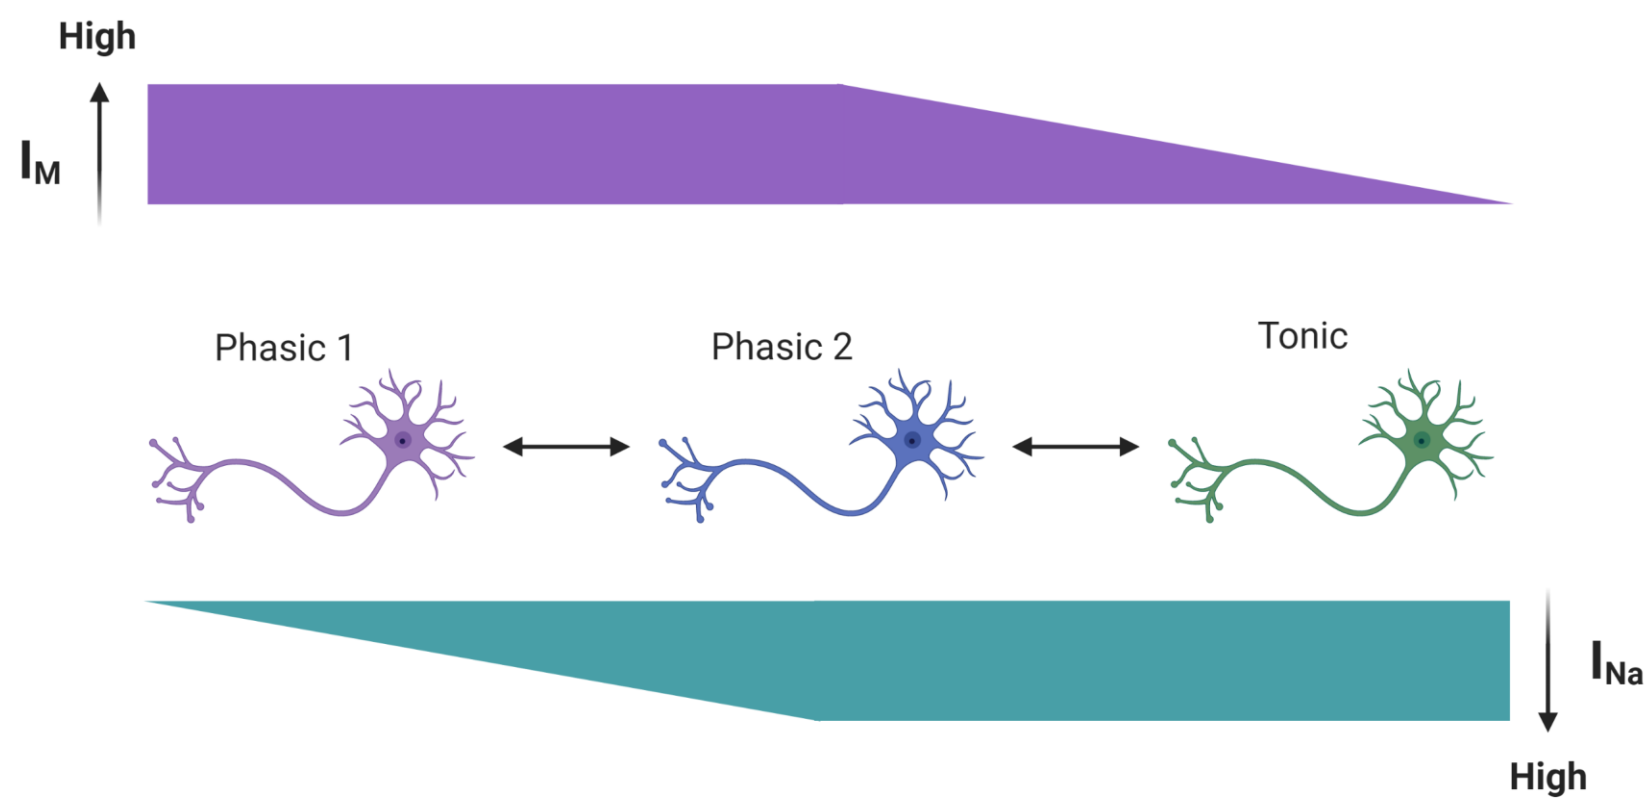

B

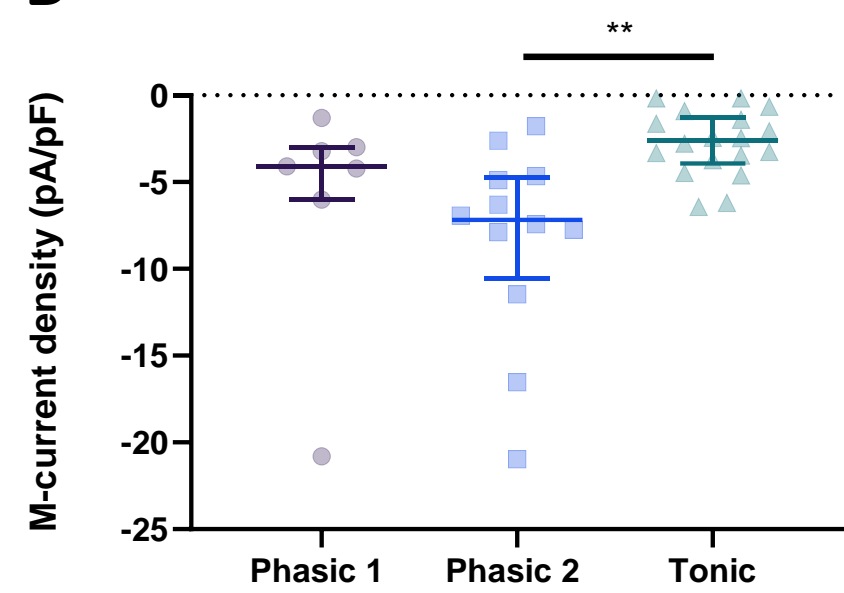

C

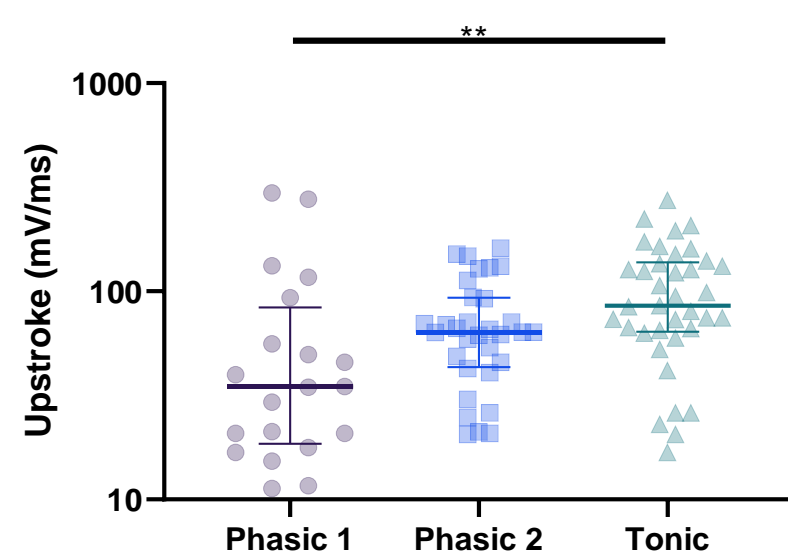

D

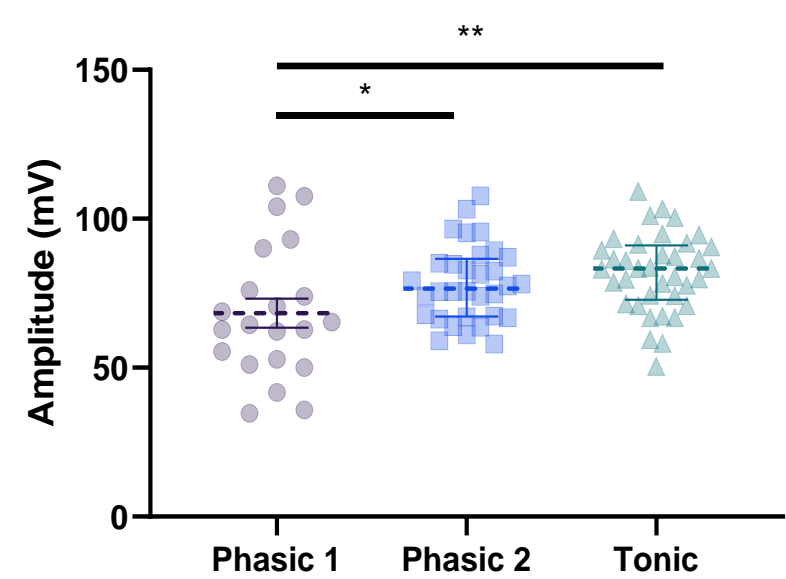

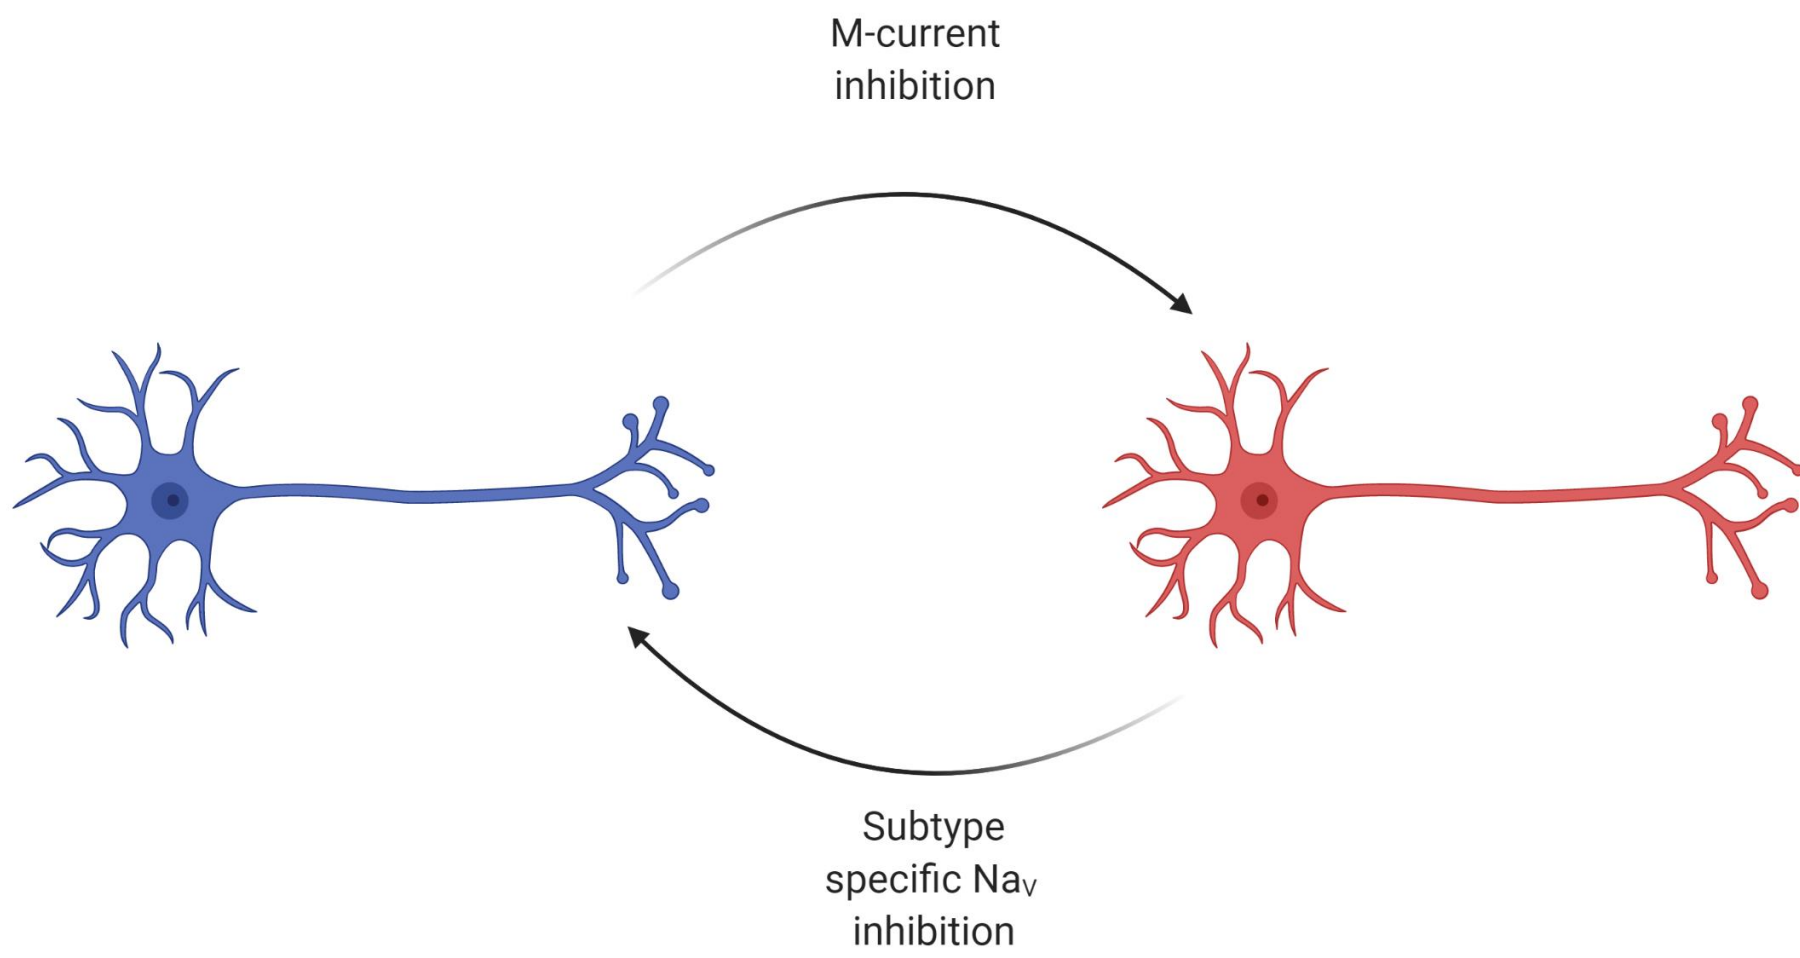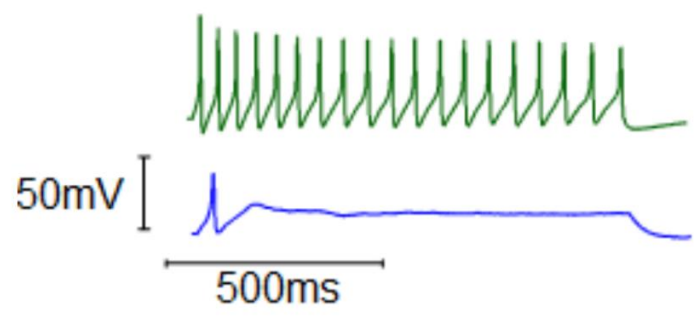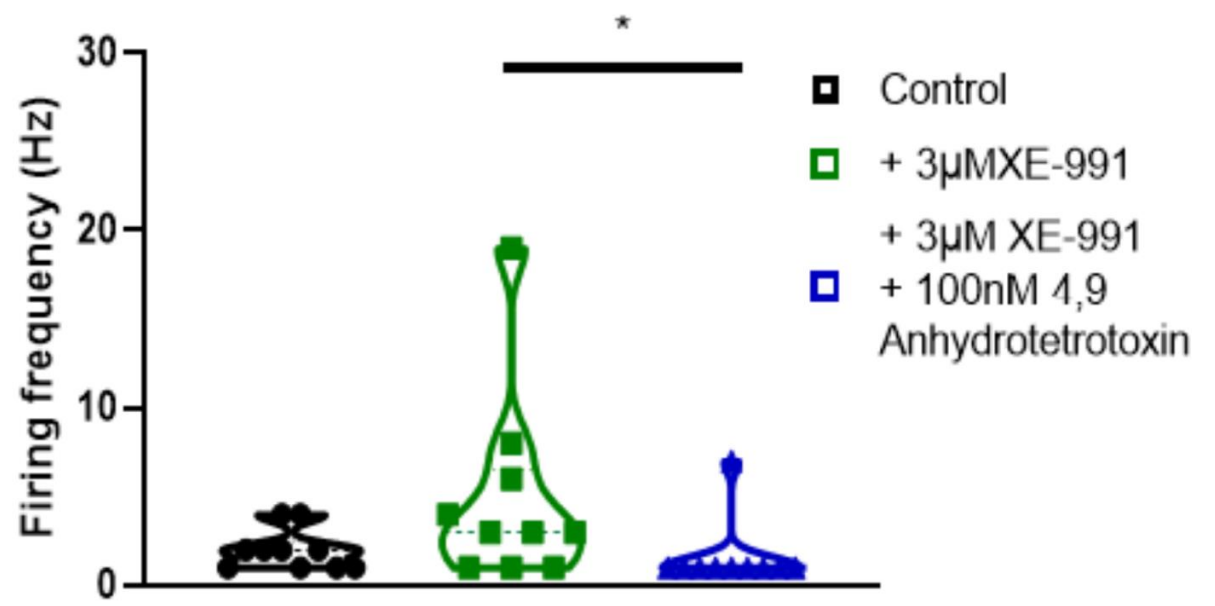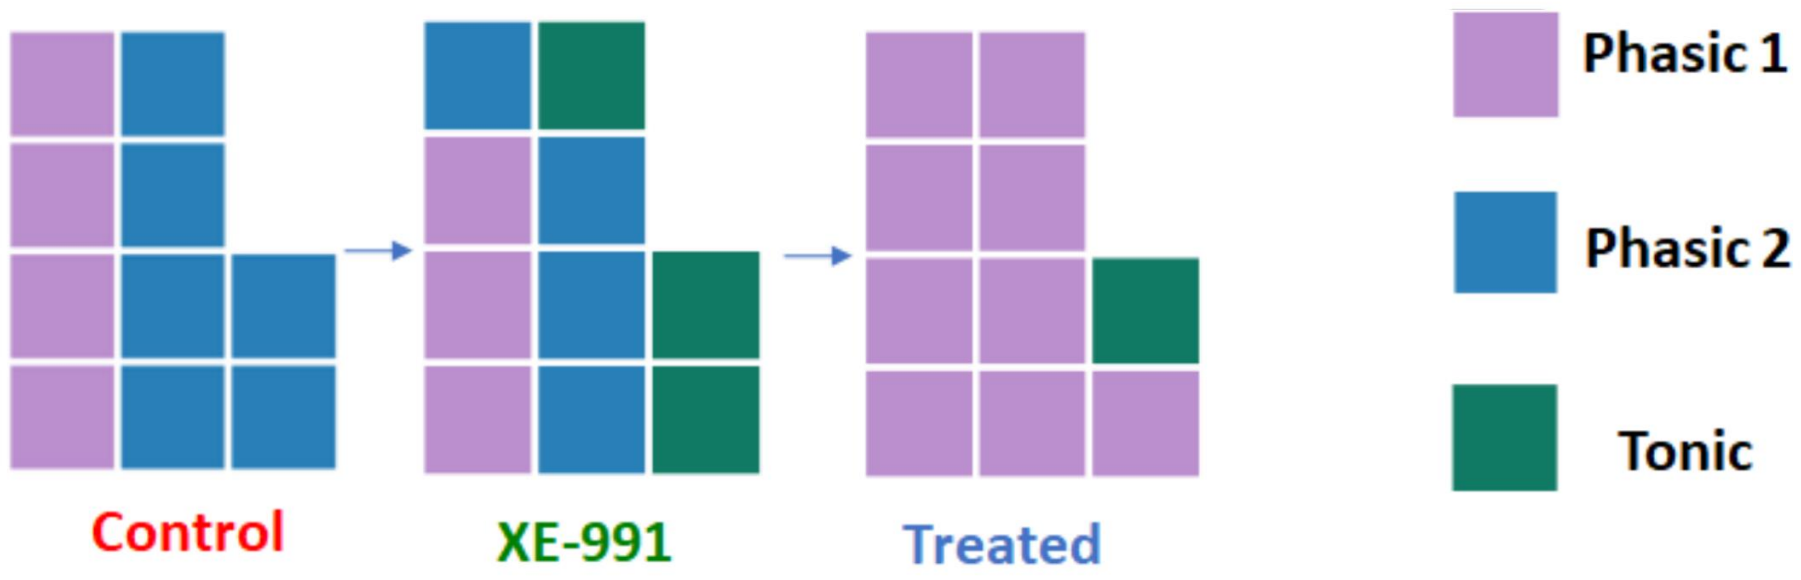



S5 A

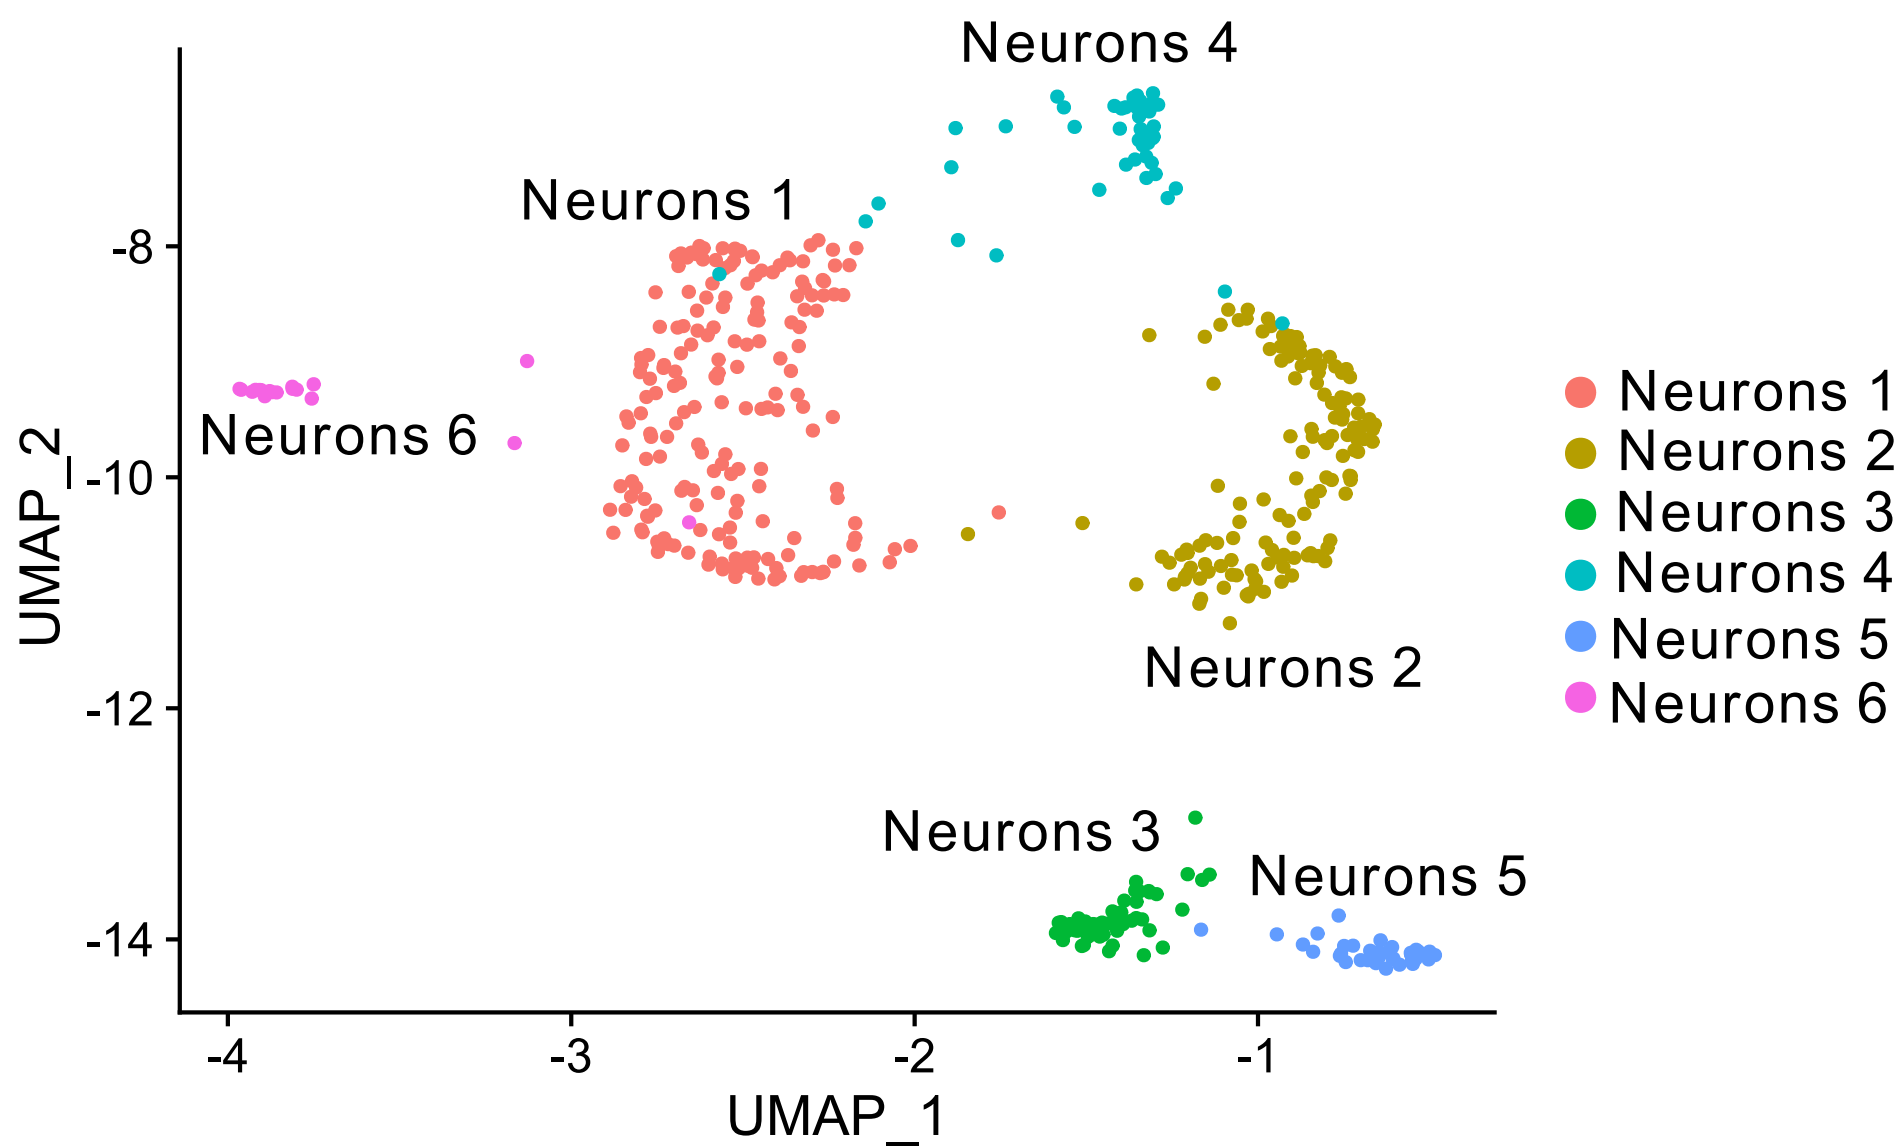

B

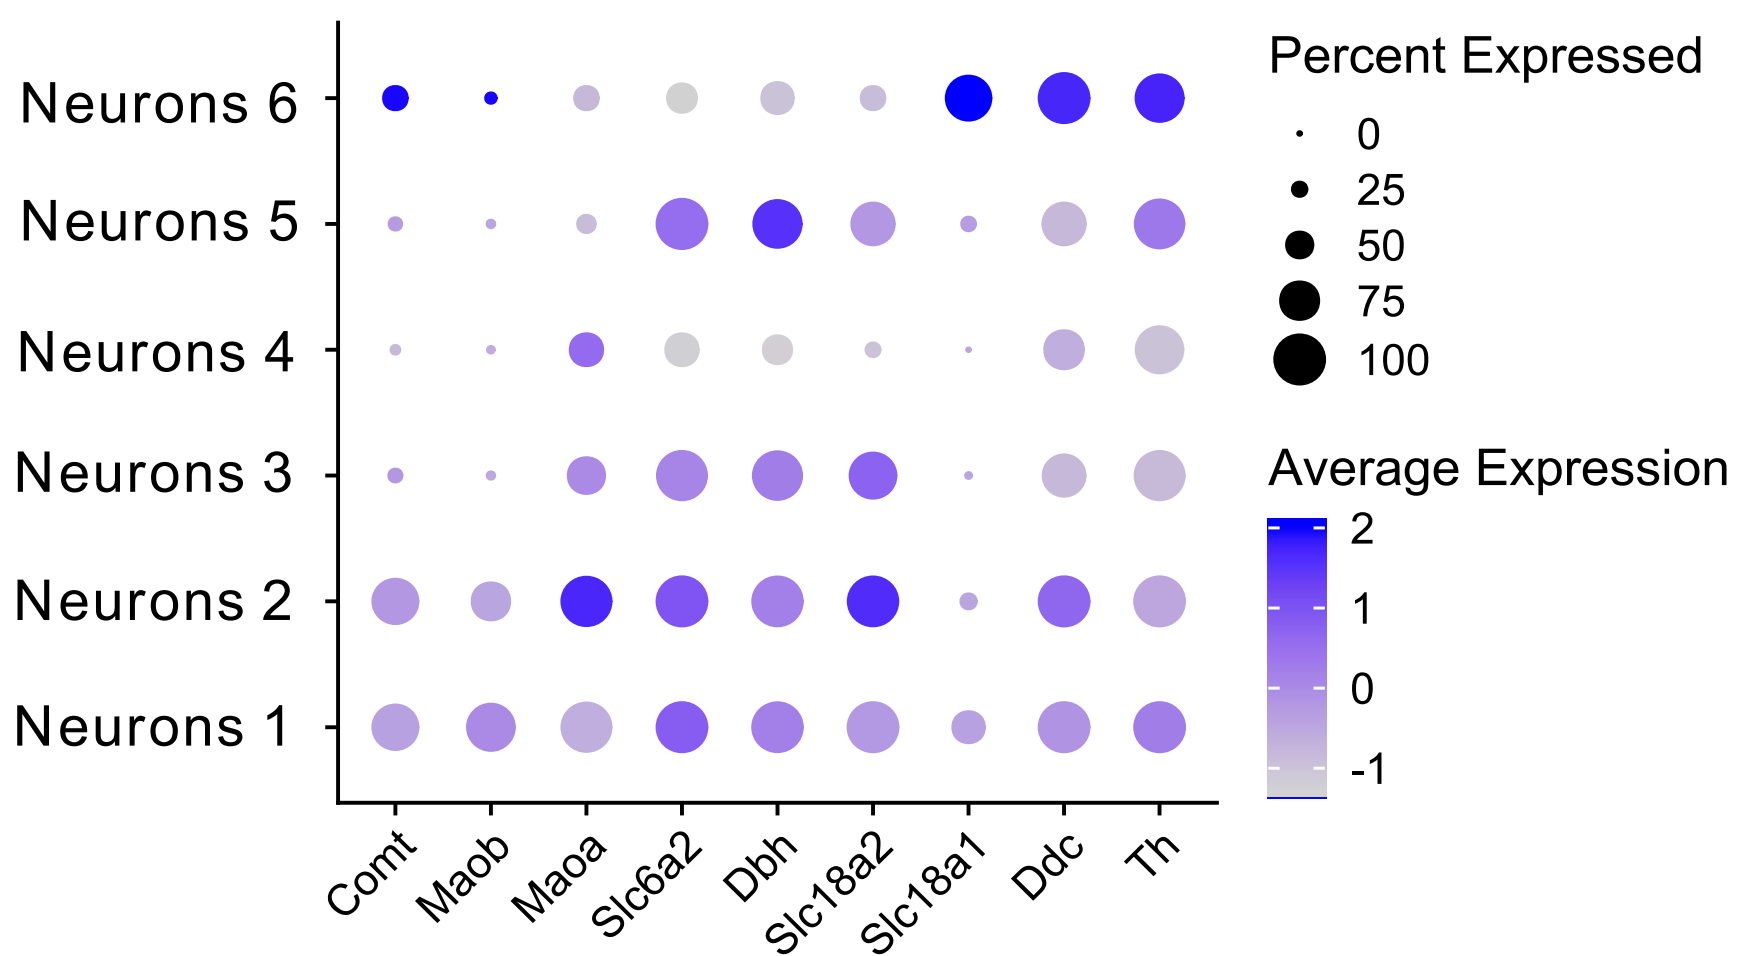

C

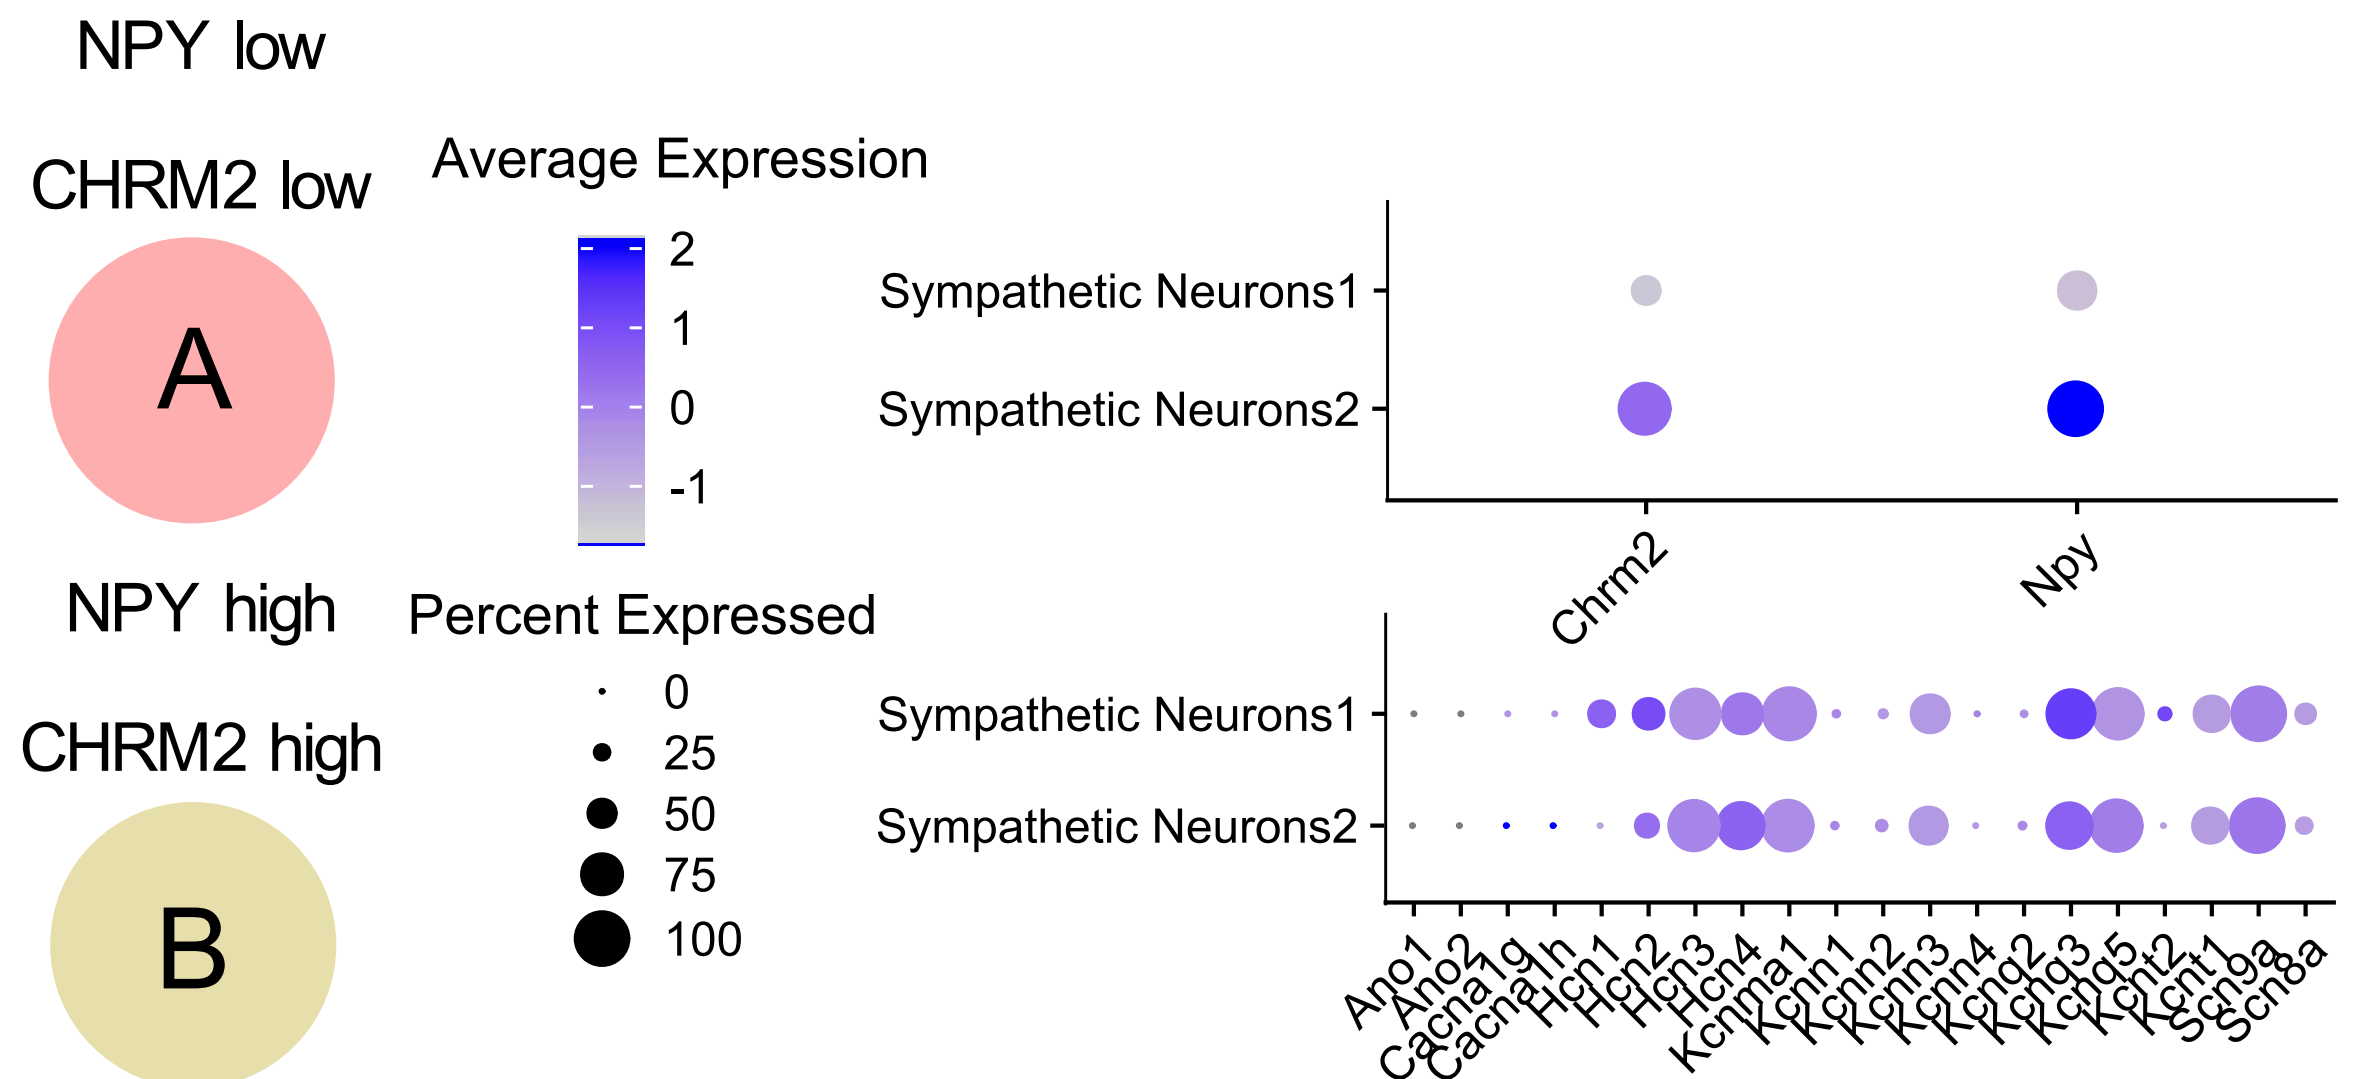

S6  
A

## Increased expression

| Gene         | Log2Fold change | Adjusted P value |
|--------------|-----------------|------------------|
| Jund         | 1.5082516       | 4.367859e-101    |
| S100a6       | 1.0578275       | 2.450488e-09     |
| LOC100364435 | 0.7454090       | 5.585682e-14     |
| Lgals3       | 0.7439313       | 1.889339e-21     |
| Rgs10        | 0.6371928       | 2.374208e-20     |
| Cox7c        | 0.6360328       | 1.545634e-14     |
| Ifi2712b     | 0.5969734       | 1.413566e-10     |
| Rps25        | 0.5790300       | 2.864862e-22     |
| Nbl1         | 0.5747978       | 6.333336e-11     |
| Lgals1       | 0.5714637       | 1.392294e-13     |
| RT1-A1       | 0.5460656       | 7.680405e-20     |
| Atp5f1e      | 0.5318127       | 1.876125e-08     |
| Tmsb4x       | 0.5265573       | 3.358830e-05     |
| Lix1         | 0.5142321       | 3.978586e-15     |
| Cops9        | 0.4927932       | 1.323195e-15     |
| Gsta4        | 0.4855133       | 3.403365e-50     |
| Gabarap      | 0.4794821       | 8.050229e-08     |
| Sncg         | 0.4733403       | 9.515786e-06     |
| Lynx1        | 0.4652957       | 2.303662e-13     |
| Fxyd6        | 0.4546705       | 1.184943e-11     |
| Gap43        | 0.4534140       | 1.044454e-11     |
| LOC100359583 | 0.4523299       | 6.131520e-09     |
| Ube2s        | 0.4504232       | 7.396337e-23     |
| LOC103689961 | 0.4501770       | 5.011713e-04     |
| Rps15a       | 0.4469772       | 3.038277e-04     |
| Nrsn1        | 0.4431640       | 3.459381e-19     |
| Cd24         | 0.4429852       | 4.084656e-10     |
| Pfn1         | 0.4382201       | 5.952396e-06     |
| Clic3        | 0.4381656       | 2.269674e-21     |
| Id1          | 0.4362874       | 3.333847e-09     |
| S100a11      | 0.4360989       | 3.040743e-07     |
| Cstb         | 0.4340093       | 1.223860e-12     |
| Dynll1       | 0.4320592       | 6.394903e-09     |
| Rpl6         | 0.4313981       | 2.959553e-07     |
| Mt3          | 0.4196665       | 1.086267e-03     |
| Ywhah        | 0.4167402       | 9.640197e-09     |
| S100a10      | 0.4156335       | 5.061056e-08     |
| Crip1        | 0.4131412       | 1.000000e+00     |
| Cox6c        | 0.4121257       | 2.138002e-05     |
| RGD1564664   | 0.4105464       | 6.250173e-09     |
| Cox8a        | 0.4105403       | 2.700923e-03     |
| Ctnx1        | 0.4092833       | 2.431107e-07     |
| Tppp3        | 0.4087822       | 1.062926e-12     |
| Fabp5        | 0.4030572       | 4.743981e-08     |
| Atp5mc2      | 0.4022625       | 1.413702e-05     |
| Rps27a.1     | 0.4015203       | 1.378063e-02     |
| Uqcrq        | 0.3967584       | 1.291659e-07     |
| Ndufb2       | 0.3958326       | 9.469155e-06     |
| LOC687780    | 0.3952969       | 4.839876e-04     |
| Sncb         | 0.3943067       | 5.081632e-09     |
| Rps4x.1      | 0.3931921       | 1.000000e+00     |
| Ost4         | 0.3926721       | 8.414767e-07     |
| Fkbp1b       | 0.3924926       | 1.496808e-04     |
| Rpl41        | 0.3922107       | 9.844968e-04     |
| Rpl24        | 0.3918698       | 5.646911e-02     |
| Elob         | 0.3912504       | 9.582211e-06     |
| Rpl10        | 0.3908021       | 9.266765e-06     |
| Id3          | 0.3898860       | 2.287913e-09     |
| Timm8b       | 0.3896933       | 1.247257e-06     |
| Atp5pf       | 0.3882082       | 1.176928e-06     |

## Neurons

B

## Decreased expression

| Gene        | Log2Fold change | Adjusted P value |
|-------------|-----------------|------------------|
| AC134224.1  | -1.1919235      | 7.390003e-14     |
| AC134224.3  | -1.1243569      | 2.337894e-01     |
| Rsrp1       | -1.0110946      | 8.436000e-07     |
| Cd9         | -1.0105276      | 2.551646e-14     |
| Pcp4        | -0.8881339      | 2.445960e-21     |
| Avil        | -0.8147849      | 1.833540e-32     |
| Apoe        | -0.8061488      | 1.826096e-01     |
| Snhg11      | -0.7870100      | 1.000000e+00     |
| Clasrp      | -0.7413731      | 4.021941e-03     |
| Gria2       | -0.7367756      | 2.002588e-10     |
| Snrnp70     | -0.7127888      | 4.602979e-02     |
| AABR0704338 | -0.7011961      | 7.905533e-25     |
| 9.1         | -0.7011961      | 7.905533e-25     |
| Rock1       | -0.6985003      | 1.892195e-04     |
| Tnpo1       | -0.6799992      | 1.659938e-15     |
| Mcf2l       | -0.6690244      | 1.769559e-07     |
| Slc12a3     | -0.6554360      | 2.632086e-24     |
| Xkr6        | -0.6535802      | 3.527137e-01     |
| Insrr       | -0.6426622      | 6.661967e-04     |
| AC134224.2  | -0.6362384      | 1.233835e-04     |
| Kifc2       | -0.6291232      | 3.462901e-03     |
| Alcam       | -0.6282179      | 2.411339e-07     |
| Macf1       | -0.6187952      | 1.524047e-14     |
| Ddc         | -0.5950884      | 2.365693e-18     |
| Rbfox1      | -0.5945057      | 5.243143e-03     |
| Prnir       | -0.5908631      | 6.034754e-03     |
| Leng8       | -0.5850844      | 1.022591e-03     |
| Aqp1        | -0.5821055      | 4.037932e-08     |
| Ssbp4       | -0.5752207      | 2.196309e-01     |
| Abca7       | -0.5728495      | 2.284495e-03     |
| Epha5       | -0.5728401      | 8.027044e-07     |
| Ogt         | -0.5657906      | 7.585591e-07     |
| Srrm2       | -0.5603236      | 1.537572e-02     |
| Srsf2       | -0.5566520      | 3.052943e-04     |
| Zbtb20      | -0.5551126      | 3.212383e-05     |
| Stk38       | -0.5509250      | 1.375099e-06     |
| Carmil3     | -0.5479098      | 4.352376e-03     |
| Lss         | -0.5475808      | 1.238291e-03     |
| Agrn        | -0.5446013      | 3.798112e-04     |
| Prkg2       | -0.5419457      | 9.840020e-18     |
| Ddx39b      | -0.5372624      | 6.367377e-05     |
| Bripn2      | -0.5350721      | 4.241865e-05     |
| Pnn         | -0.5290578      | 6.977921e-02     |
| Pcmdt2      | -0.5265765      | 3.677216e-03     |
| Sparc       | -0.5206209      | 1.000000e+00     |
| Pabpn1      | -0.5186682      | 9.728370e-01     |
| Vav2        | -0.5151115      | 2.180735e-06     |
| Pclo        | -0.5125366      | 3.626956e-08     |
| Arhgap21    | -0.5025987      | 7.737147e-11     |
| P3h3        | -0.5017257      | 5.764083e-10     |
| Trafd1      | -0.4986911      | 4.079081e-03     |
| Zcchc7      | -0.4942523      | 1.663439e-01     |
| Nfat5       | -0.4886901      | 4.319940e-05     |
| Atp13a2     | -0.4856006      | 2.457154e-08     |
| Taf1d       | -0.4822939      | 1.000000e+00     |
| Luc7l3      | -0.4804302      | 3.571888e-03     |
| Atxn2l      | -0.4792462      | 6.461217e-02     |
| Cacna1b     | -0.4773798      | 1.671714e-04     |
| Chl1        | -0.4741254      | 9.661983e-10     |
| Abca8a      | -0.4734990      | 1.000000e+00     |
| RT1-CE4     | -0.4724680      | 3.738463e-21     |

C

## Top expressed

| Gene           | Wistar Reads |
|----------------|--------------|
| Mt-cyb         | 5.441520     |
| Mt-co1         | 5.067902     |
| Mt-nd2         | 4.896349     |
| Mt-nd1         | 4.574465     |
| Mt-nd4         | 4.544456     |
| Tuba1a         | 4.350063     |
| LOC100364435   | 4.156522     |
| Prph           | 4.076758     |
| AC134224.1     | 3.993742     |
| Stmn2          | 3.834467     |
| Tubb3          | 3.824851     |
| Map1b          | 3.812369     |
| Sncg           | 3.809325     |
| Tmsb4x         | 3.784265     |
| Hsp90ab1       | 3.410114     |
| Snhg11         | 3.294435     |
| Atp6v0c        | 3.286958     |
| Uchl1          | 3.257605     |
| Atp1a1         | 3.224183     |
| Actg1          | 3.214234     |
| Syt1           | 3.194060     |
| Tubb5          | 3.174731     |
| Rtn1           | 3.150431     |
| Stmn3          | 3.148980     |
| Tubb2a         | 3.106304     |
| Fth1           | 3.086398     |
| Atp1b1         | 3.023032     |
| Tubb2b         | 3.013394     |
| Nefl           | 3.004773     |
| Snap25         | 2.914318     |
| S100a6         | 2.890331     |
| Zwint          | 2.872957     |
| Syt4           | 2.869539     |
| Stmn1          | 2.865590     |
| Ndrp4          | 2.860553     |
| Cd9            | 2.846434     |
| Elavl2         | 2.840360     |
| Ndfip1         | 2.839060     |
| Slc6a2         | 2.825227     |
| Basp1          | 2.824477     |
| Rtn3           | 2.799926     |
| Calm1          | 2.788565     |
| Ywhah          | 2.779392     |
| Reep5          | 2.768612     |
| Cyb561         | 2.765191     |
| Ntrk1          | 2.736131     |
| Dst            | 2.726988     |
| Tspan8         | 2.718403     |
| Cfl1           | 2.716252     |
| App            | 2.709063     |
| Cd24           | 2.707676     |
| Nsg1           | 2.702262     |
| LOC103692716   | 2.695446     |
| Rtn4           | 2.687459     |
| Gap43          | 2.659190     |
| Bcat1          | 2.658582     |
| LOC108348172.1 | 2.656803     |
| Aldoa          | 2.631778     |
| Lgals1         | 2.622184     |

D

## Channels assessed

| Gene    | Channel                     |
|---------|-----------------------------|
| Scn1a   | Na <sub>v</sub> 1.1         |
| Scn2a   | Na <sub>v</sub> 1.2         |
| Scn3a   | Na <sub>v</sub> 1.3         |
| Scn4a   | Na <sub>v</sub> 1.4         |
| Scn5a   | Na <sub>v</sub> 1.5         |
| Scn7a   | Na <sub>v</sub> 2.1         |
| Scn8a   | Na <sub>v</sub> 1.6         |
| Scn9a   | Na <sub>v</sub> 1.7         |
| Scn10a  | Na <sub>v</sub> 1.8         |
| Scn11a  | Na <sub>v</sub> 1.9         |
| Hcn1    | HCN1                        |
| Hcn2    | HCN2                        |
| Hcn3    | HCN3                        |
| Hcn4    | HCN4                        |
| Ano1    | TMEM16A                     |
| Ano2    | TMEM16B                     |
| Cacna1c | Ca <sub>v</sub> 1.2         |
| Cacna1d | Ca <sub>v</sub> 1.3         |
| Cacna1a | Ca <sub>v</sub> 2.1         |
| Cacna1b | Ca <sub>v</sub> 2.2         |
| Cacna1g | Ca <sub>v</sub> 3.1         |
| Cacna1h | Ca <sub>v</sub> 3.2         |
| Cacna1i | Ca <sub>v</sub> 3.3         |
| Kcnt1   | SLACK                       |
| Kcnt2   | SLICK                       |
| Kcnma1  | BK(K <sub>Ca</sub> 1.1)     |
| Kcnn1   | SK1(K <sub>Ca</sub> 2.1)    |
| Kcnn2   | SK2(K <sub>Ca</sub> 2.2)    |
| Kcnn3   | SK2(K <sub>Ca</sub> 2.3)    |
| Kcnn4   | IK(K <sub>Ca</sub> 3.1)     |
| Kcna1   | K <sub>v</sub> 1.1          |
| Kcna2   | K <sub>v</sub> 1.2          |
| Kcna3   | K <sub>v</sub> 1.3          |
| Kcna4   | A-type (K <sub>v</sub> 1.4) |
| Kcna5   | K <sub>v</sub> 1.5          |
| Kcna6   | K <sub>v</sub> 1.6          |
| Kcna7   | K <sub>v</sub> 1.7          |
| Kcnb1   | K <sub>v</sub> 2.1          |
| Kcnb2   | K <sub>v</sub> 2.2          |
| Kcnc1   | K <sub>v</sub> 3.1          |
| Kcnc2   | K <sub>v</sub> 3.2          |
| Kcnc3   | A-type (K <sub>v</sub> 3.3) |
| Kcnc4   | A-type (K <sub>v</sub> 3.4) |
| Kcnd1   | A-type (K <sub>v</sub> 4.1) |
| Kcnd2   | A-type (K <sub>v</sub> 4.2) |
| Kcnd3   | A-type (K <sub>v</sub> 4.3) |
| Kcnf1   | K <sub>v</sub> 5.1          |
| Kcng1   | K <sub>v</sub> 6.1          |
| Kcng2   | K <sub>v</sub> 6.2          |
| Kcng4   | K <sub>v</sub> 6.3          |
| Kcng3   | K <sub>v</sub> 6.4          |
| Kcnq2   | K <sub>v</sub> 7.2          |
| Kcnq3   | K <sub>v</sub> 7.3          |
| Kcnq4   | K <sub>v</sub> 7.4          |
| Kcnq5   | K <sub>v</sub> 7.5          |
| Kcnk1   | K <sub>2p</sub> 1.1         |
| Kcnk2   | K <sub>2p</sub> 2.1         |
| Kcnk3   | K <sub>2p</sub> 3.1         |
| Kcnk4   | K <sub>2p</sub> 4.1         |
| Kcnk5   | K <sub>2p</sub> 5.1         |
| Kcnk6   | K <sub>2p</sub> 6.1         |
| Kcnk7   | K <sub>2p</sub> 7.1         |

S7

A

## Immune cell Markers

| Gene    | Log2Fold change | Percentage 1 | Percentage 2 | Adjusted P value |
|---------|-----------------|--------------|--------------|------------------|
| C1qa    | 3.5180842       | 0.877        | 0.046        | 0.000000e+00     |
| Cxcl2   | 3.6511131       | 0.743        | 0.027        | 0.000000e+00     |
| C1qb    | 3.4324098       | 0.823        | 0.038        | 0.000000e+00     |
| C1qc    | 3.3461027       | 0.827        | 0.037        | 0.000000e+00     |
| Tyrobp  | 2.9095431       | 0.937        | 0.042        | 0.000000e+00     |
| Fcer1g  | 2.8219276       | 0.930        | 0.037        | 0.000000e+00     |
| Cfh     | 2.8945865       | 0.897        | 0.032        | 0.000000e+00     |
| Aif1    | 2.6733969       | 0.910        | 0.065        | 0.000000e+00     |
| Il1b    | 3.0137275       | 0.760        | 0.023        | 0.000000e+00     |
| Bcl2a1  | 2.6581615       | 0.850        | 0.023        | 0.000000e+00     |
| Cd83    | 2.7810403       | 0.883        | 0.018        | 0.000000e+00     |
| Mrc1    | 2.4344799       | 0.867        | 0.021        | 0.000000e+00     |
| Ccl6    | 2.3750514       | 0.840        | 0.015        | 0.000000e+00     |
| Pf4     | 2.1622164       | 0.780        | 0.014        | 0.000000e+00     |
| Laptm5  | 2.0547600       | 0.993        | 0.058        | 0.000000e+00     |
| Cybb    | 2.3030469       | 0.893        | 0.014        | 0.000000e+00     |
| Csf1r   | 2.2658411       | 0.880        | 0.016        | 0.000000e+00     |
| Clec10a | 2.2311328       | 0.870        | 0.018        | 0.000000e+00     |
| Rgs1    | 1.8959000       | 0.790        | 0.012        | 0.000000e+00     |
| Cfd     | 1.4389330       | 0.637        | 0.009        | 0.000000e+00     |

B

## Vascular smooth muscle cell Markers

| Gene       | Log2Fold change | Percentage 1 | Percentage 2 | Adjusted P value |
|------------|-----------------|--------------|--------------|------------------|
| Acta2      | 3.4346256       | 0.845        | 0.022        | 0.000000e+00     |
| Tagln      | 3.2154856       | 0.764        | 0.078        | 9.542926e-145    |
| RGD1564664 | 2.9895026       | 0.991        | 0.253        | 1.159849e-102    |
| Myh11      | 2.8686134       | 0.627        | 0.054        | 4.842476e-133    |
| Rasl11a    | 2.6877606       | 0.891        | 0.055        | 8.564578e-253    |
| Mustn1     | 2.5042547       | 0.855        | 0.117        | 1.658917e-132    |
| Tpm2       | 2.4530870       | 0.882        | 0.275        | 2.984776e-73     |
| Myl9       | 2.4404292       | 0.891        | 0.239        | 4.692441e-85     |
| Mgp        | 2.3238439       | 1.000        | 0.211        | 1.751286e-112    |
| Des        | 2.1621336       | 0.818        | 0.022        | 0.000000e+00     |
| Vtn        | 2.0786987       | 0.855        | 0.060        | 3.201642e-213    |
| Cox4i2     | 1.9366285       | 0.918        | 0.196        | 9.119496e-104    |
| Rgs5       | 1.8996050       | 0.736        | 0.022        | 0.000000e+00     |
| Tpm1       | 1.8941308       | 0.918        | 0.575        | 5.534833e-44     |
| Fabp4      | 1.8823574       | 0.718        | 0.025        | 2.387438e-280    |
| Adamts1    | 1.8798563       | 0.700        | 0.179        | 1.850121e-52     |
| Mylk       | 1.8776962       | 0.836        | 0.091        | 4.514715e-153    |
| Npy1r      | 1.8622683       | 0.855        | 0.031        | 0.000000e+00     |
| Ndufa4l2   | 1.8418009       | 0.918        | 0.097        | 8.715348e-177    |
| Hopx       | 1.7450186       | 0.864        | 0.050        | 5.282456e-251    |

C

## Glia cell Markers

| Gene         | Log2Fold change | Percentage 1 | Percentage 2 | Adjusted P value |
|--------------|-----------------|--------------|--------------|------------------|
| Dbi          | 2.0501341       | 1.000        | 0.976        | 0.000000e+00     |
| Fxyd1        | 2.0230451       | 0.998        | 0.679        | 0.000000e+00     |
| Sostdc1      | 1.9505253       | 0.968        | 0.292        | 0.000000e+00     |
| Scn7a        | 1.8488933       | 0.990        | 0.387        | 0.000000e+00     |
| Cdh19        | 1.7355892       | 0.980        | 0.265        | 0.000000e+00     |
| Vwa1         | 1.6739017       | 0.992        | 0.472        | 0.000000e+00     |
| Abca8a       | 1.6606951       | 0.994        | 0.604        | 0.000000e+00     |
| Sfrp5        | 1.6566244       | 0.952        | 0.317        | 0.000000e+00     |
| Art3         | 1.5968683       | 0.992        | 0.335        | 0.000000e+00     |
| S100b        | 1.5535275       | 0.982        | 0.475        | 0.000000e+00     |
| LOC108348061 | 1.5519136       | 0.860        | 0.415        | 0.000000e+00     |
| Gpr37l1      | 1.5491717       | 0.945        | 0.199        | 0.000000e+00     |
| Cnn3         | 1.5430965       | 0.995        | 0.760        | 0.000000e+00     |
| Lgi4         | 1.5341173       | 0.979        | 0.311        | 0.000000e+00     |
| Col28a1      | 1.5185676       | 0.912        | 0.200        | 0.000000e+00     |
| Pdlim4       | 1.5179088       | 0.966        | 0.323        | 0.000000e+00     |
| Tmod2        | 1.5000766       | 0.929        | 0.392        | 0.000000e+00     |
| Gpm6b        | 1.4857464       | 0.972        | 0.330        | 0.000000e+00     |
| Rarres2      | 1.4785534       | 0.986        | 0.456        | 0.000000e+00     |
| Egfl8        | 1.4631824       | 0.970        | 0.365        | 0.000000e+00     |

D

## Fibroblast Markers

| Gene     | Log2Fold change | Percentage 1 | Percentage 2 | Adjusted P Value |
|----------|-----------------|--------------|--------------|------------------|
| Apod     | 5.0702161       | 0.972        | 0.444        | 8.531948e-70     |
| Dcn      | 4.4300866       | 1.000        | 0.257        | 1.504777e-106    |
| Myoc     | 4.2646390       | 0.991        | 0.091        | 5.961128e-216    |
| Lum      | 3.8051183       | 1.000        | 0.113        | 1.256168e-188    |
| Gsn      | 3.0628327       | 1.000        | 0.824        | 3.071820e-63     |
| Thbs4    | 2.9821255       | 1.000        | 0.044        | 0.000000e+00     |
| Col3a1   | 2.9581712       | 1.000        | 0.846        | 9.210442e-65     |
| Mgp      | 2.8940880       | 0.991        | 0.212        | 2.892069e-110    |
| Igfbp5   | 2.6937379       | 0.755        | 0.328        | 2.660498e-33     |
| Col1a1   | 2.6731355       | 1.000        | 0.823        | 4.557282e-63     |
| Col15a1  | 2.5881164       | 1.000        | 0.545        | 6.192017e-70     |
| Crispld2 | 2.5701496       | 0.943        | 0.042        | 0.000000e+00     |
| Fn1      | 2.5640687       | 1.000        | 0.250        | 3.140104e-102    |
| Gpc3     | 2.5392989       | 0.972        | 0.024        | 0.000000e+00     |
| Smoc2    | 2.4793013       | 0.934        | 0.027        | 0.000000e+00     |
| Serpinf1 | 2.4357652       | 0.972        | 0.066        | 6.852849e-261    |
| Pcolce   | 2.4270370       | 1.000        | 0.151        | 6.559569e-153    |
| Mmp2     | 2.3279613       | 1.000        | 0.120        | 2.809839e-179    |
| Aebp1    | 2.2966367       | 0.981        | 0.103        | 3.657190e-192    |
| Igfbp6   | 2.2607160       | 0.830        | 0.096        | 1.724846e-134    |

E

## Endothelial cell Markers

| Gene    | Log2Fold change | Percentage 1 | Percentage 2 | Adjusted P Value |
|---------|-----------------|--------------|--------------|------------------|
| Plvap   | 2.6699906       | 0.976        | 0.030        | 0.000000e+00     |
| Aqp1    | 2.5668906       | 0.961        | 0.146        | 0.000000e+00     |
| Rgs16   | 2.5153660       | 0.821        | 0.101        | 0.000000e+00     |
| Sele    | 2.4944279       | 0.374        | 0.014        | 7.421128e-235    |
| Fit1    | 2.3509513       | 0.966        | 0.019        | 0.000000e+00     |
| Slco1a4 | 2.1993135       | 0.918        | 0.029        | 0.000000e+00     |
| Selp    | 2.1762584       | 0.466        | 0.018        | 4.578829e-295    |
| Emcn    | 2.1625471       | 0.978        | 0.038        | 0.000000e+00     |
| Abcg2   | 2.1382139       | 0.913        | 0.041        | 0.000000e+00     |
| Cldn5   | 2.1186817       | 0.787        | 0.024        | 0.000000e+00     |
| Cyrr1   | 2.1040015       | 0.971        | 0.028        | 0.000000e+00     |
| Fam110d | 2.0985356       | 0.886        | 0.022        | 0.000000e+00     |
| Rnd1    | 2.0177000       | 0.659        | 0.071        | 2.776598e-287    |
| Cav1    | 2.0059116       | 0.957        | 0.087        | 0.000000e+00     |
| Cxcl12  | 1.9573106       | 0.717        | 0.027        | 0.000000e+00     |
| Thbd    | 1.9078395       | 0.882        | 0.118        | 0.000000e+00     |
| Cdh5    | 1.8601120       | 0.966        | 0.029        | 0.000000e+00     |
| Adgrf5  | 1.8066178       | 0.940        | 0.050        | 0.000000e+00     |
| Id1     | 1.7850078       | 0.812        | 0.168        | 4.762163e-249    |
| Kdr     | 1.7653330       | 0.860        | 0.018        | 0.000000e+00     |

F

## Sympathetic neuron Markers

| Gene    | Log2Fold change | Percentage 1 | Percentage 2 | Adjusted P Value |
|---------|-----------------|--------------|--------------|------------------|
| Snhg11  | 3.2061663       | 0.990        | 0.046        | 0.000000e+00     |
| Insrr   | 1.7951871       | 0.997        | 0.062        | 0.000000e+00     |
| Smpd3   | 0.8982419       | 0.895        | 0.085        | 0.000000e+00     |
| Cacna1b | 1.1997503       | 0.978        | 0.075        | 0.000000e+00     |
| Spock3  | 0.7479784       | 0.762        | 0.078        | 8.747048e-264    |
| Gpr22   | 0.5700290       | 0.790        | 0.054        | 0.000000e+00     |
| Tmem59l | 0.7677566       | 0.787        | 0.072        | 0.000000e+00     |
| March11 | 0.6499392       | 0.857        | 0.064        | 0.000000e+00     |
| Sgsm1   | 0.9615743       | 0.956        | 0.057        | 0.000000e+00     |
| Atp2b2  | 0.8224142       | 0.908        | 0.061        | 0.000000e+00     |
| Ptchd1  | 0.8112243       | 0.838        | 0.063        | 0.000000e+00     |
| Dmkn    | 0.6906363       | 0.698        | 0.054        | 4.118108e-285    |
| Eml5    | 1.0585886       | 0.911        | 0.036        | 0.000000e+00     |
| Gria2   | 1.2867993       | 0.962        | 0.054        | 0.000000e+00     |
| Arfgef3 | 0.6022328       | 0.883        | 0.036        | 0.000000e+00     |
| Slc27a6 | 0.4985297       | 0.581        | 0.034        | 2.999406e-273    |
| Slc7a14 | 0.6440851       | 0.825        | 0.064        | 0.000000e+00     |
| B3galt1 | 0.6604370       | 0.854        | 0.050        | 0.000000e+00     |
| Plppr5  | 0.5191926       | 0.794        | 0.037        | 0.000000e+00     |
| Shisal1 | 0.4718486       | 0.816        | 0.044        | 0.000000e+00     |
